# Supplementary material for: Theoretical Investigations on the Reactivity of Hydrogen Peroxide toward 2,3,7,8-Tetrachlorodibenzo-p-dioxin
Source: MDPI journal article supplement (doi:10.3390/molecules23112826), 2018-10-31
Supplement: s1 [file s1]

# Theoretical Investigations on the Reactivity of Hydrogen Peroxide toward 2,3,7,8-Tetrachlorodibenzo-*p*-dioxin

Weihua Wang \*, Yuhua Wang, Wenling Feng, Wenliang Wang and Ping Li \*

Key Laboratory of Life-Organic Analysis, School of Chemistry and Chemical Engineering, Qufu Normal University, Qufu 273165, China; wyhqfnu@163.com (Y.W.); wlfengqf@163.com (W.F.); wllwangqf@126.com (W.W.)

\* Correspondence: ww78@163.com (W.W.); lignip@163.com

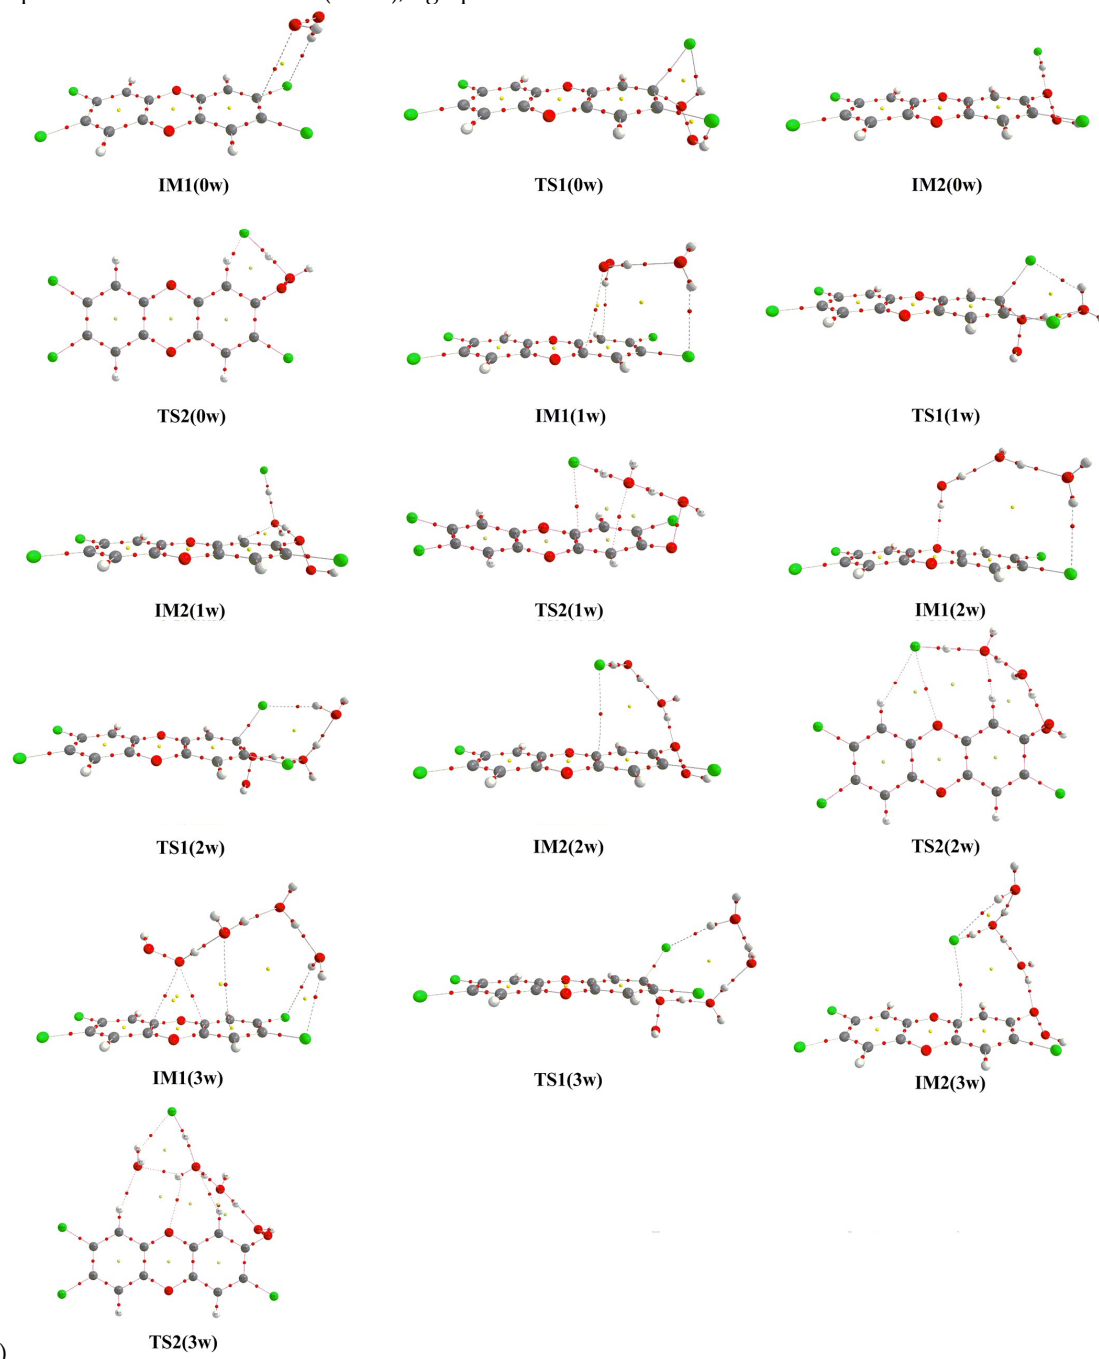

**Figure S1.** Molecular graphs of the intermediates (IM) and transition states (TS) in the different reaction pathways involving neutral H<sub>2</sub>O<sub>2</sub>. BCP and RCP are represented by red and yellow dots, respectively.

**Table S1.** Topological parameters for the intermediates in the different reaction pathways involving neutral H<sub>2</sub>O<sub>2</sub><sup>a</sup>

| Species | BCP        | $\rho_{\text{bcp}}$ | $\nabla^2\rho_{\text{bcp}}$ | $V_{\text{bcp}}$ | $G_{\text{bcp}}$ | $H_{\text{bcp}}$ |
|---------|------------|---------------------|-----------------------------|------------------|------------------|------------------|
| IM1(0w) | C117...H23 | 0.0103              | 0.0332                      | -0.0047          | 0.0065           | 0.0018           |
|         | C11...O25  | 0.0029              | 0.0099                      | -0.0016          | 0.0020           | 0.0005           |
|         | O24...O25  | 0.2735              | 0.0374                      | -0.3636          | 0.1865           | -0.1771          |
| IM2(0w) | O24...O25  | 0.2511              | 0.1360                      | -0.3292          | 0.1816           | -0.1476          |
|         | O25...H26  | 0.0244              | 0.0839                      | -0.0165          | 0.0188           | 0.0022           |
| IM1(1w) | C9...H23   | 0.0058              | 0.0156                      | -0.0026          | 0.0033           | 0.0006           |
|         | O24...O25  | 0.2723              | 0.0416                      | -0.3616          | 0.1860           | -0.1756          |
|         | C118...H29 | 0.0087              | 0.0294                      | -0.0039          | 0.0056           | 0.0017           |
|         | H26...O27  | 0.0313              | 0.1094                      | -0.0254          | 0.0264           | 0.0010           |
| IM2(1w) | O25...H26  | 0.0248              | 0.0930                      | -0.0190          | 0.0211           | 0.0021           |
|         | O27...H29  | 0.0362              | 0.1135                      | -0.0280          | 0.0282           | 0.0002           |
|         | H21...O27  | 0.0059              | 0.0209                      | -0.0035          | 0.0044           | 0.0009           |
|         | O24 - O25  | 0.2480              | 0.1454                      | -0.3240          | 0.1802           | -0.1438          |
| IM1(2w) | O13...H23  | 0.0148              | 0.0522                      | -0.0101          | 0.0116           | 0.0015           |
|         | H26...O27  | 0.0353              | 0.1228                      | -0.0305          | 0.0306           | 0.0001           |
|         | C118...H32 | 0.0092              | 0.0305                      | -0.0041          | 0.0058           | 0.0018           |
|         | H29...O30  | 0.0292              | 0.1086                      | -0.0237          | 0.0254           | 0.0017           |
|         | O24...O25  | 0.2710              | 0.0443                      | -0.3591          | 0.1851           | -0.1740          |
| IM2(2w) | O24 - O25  | 0.2492              | 0.1433                      | -0.3261          | 0.1810           | -0.1452          |
|         | O25...H26  | 0.0264              | 0.1009                      | -0.0208          | 0.0230           | 0.0022           |
|         | O30...H32  | 0.0454              | 0.1260                      | -0.0381          | 0.0348           | -0.0033          |
|         | O27...H29  | 0.0346              | 0.1206                      | -0.0297          | 0.0299           | 0.0002           |
| IM1(3w) | O24...O25  | 0.2719              | 0.0438                      | -0.3613          | 0.1861           | -0.1752          |
|         | H26...O27  | 0.0396              | 0.1309                      | -0.0355          | 0.0341           | -0.0014          |
|         | H29...O30  | 0.0347              | 0.1233                      | -0.0301          | 0.0305           | 0.0003           |
|         | C117...H33 | 0.0064              | 0.0209                      | -0.0031          | 0.0042           | 0.0011           |
|         | H32...O34  | 0.0339              | 0.1188                      | -0.0288          | 0.0292           | 0.0005           |
|         | C118...H35 | 0.0098              | 0.0319                      | -0.0046          | 0.0063           | 0.0017           |
| IM2(3w) | O25...H26  | 0.0265              | 0.1000                      | -0.0209          | 0.0229           | 0.0021           |
|         | O30...H31  | 0.0817              | 0.1243                      | -0.0813          | 0.0562           | -0.0251          |
|         | O27...H29  | 0.0337              | 0.1220                      | -0.0292          | 0.0299           | 0.0006           |
|         | H32...O34  | 0.0264              | 0.0968                      | -0.0205          | 0.0224           | 0.0018           |
|         | C118...H35 | 0.0104              | 0.0342                      | -0.0052          | 0.0069           | 0.0017           |
|         | O24 - O25  | 0.2483              | 0.1458                      | -0.3245          | 0.1805           | -0.1440          |

<sup>a</sup> Atomic numbering refers to Figure 2. The  $\rho_{\text{bcp}}$ ,  $\nabla^2\rho_{\text{bcp}}$ ,  $V_{\text{bcp}}$ ,  $G_{\text{bcp}}$ , and  $H_{\text{bcp}}$  is electron density, the Laplacian of the electron density, potential energy density, kinetic energy density, and energy density at the BCP, respectively.

**Table S2.** Cartesian coordinates of the optimized species in the present study\*

| Species | x           | y           | z           | Species                       | x           | y           | z           |
|---------|-------------|-------------|-------------|-------------------------------|-------------|-------------|-------------|
| TCDD    |             |             |             | H <sub>2</sub> O <sub>2</sub> |             |             |             |
| C       | 0.00000000  | 3.57881500  | 0.69850100  | O                             | 0.00000000  | 0.72735500  | -0.05197800 |
| C       | 0.00000000  | 2.36878800  | 1.39107000  | H                             | 0.82815300  | 0.90273800  | 0.41582100  |
| C       | 0.00000000  | 1.16979600  | 0.69781000  | O                             | 0.00000000  | -0.72735500 | -0.05197800 |
| C       | 0.00000000  | 1.16979600  | -0.69781000 | H                             | -0.82815300 | -0.90273800 | 0.41582100  |
| C       | 0.00000000  | 2.36878800  | -1.39107000 |                               |             |             |             |
| C       | 0.00000000  | 3.57881500  | -0.69850100 |                               |             |             |             |
| C       | 0.00000000  | -1.16979600 | -0.69781000 |                               |             |             |             |
| C       | 0.00000000  | -1.16979600 | 0.69781000  |                               |             |             |             |
| C       | 0.00000000  | -2.36878800 | -1.39107000 |                               |             |             |             |
| C       | 0.00000000  | -2.36878800 | 1.39107000  |                               |             |             |             |
| C       | 0.00000000  | -3.57881500 | -0.69850100 |                               |             |             |             |
| C       | 0.00000000  | -3.57881500 | 0.69850100  |                               |             |             |             |
| O       | 0.00000000  | 0.00000000  | -1.42570200 |                               |             |             |             |
| O       | 0.00000000  | 0.00000000  | 1.42570200  |                               |             |             |             |
| Cl      | 0.00000000  | 5.06339400  | -1.61505000 |                               |             |             |             |
| Cl      | 0.00000000  | 5.06339400  | 1.61505000  |                               |             |             |             |
| Cl      | 0.00000000  | -5.06339400 | -1.61505000 |                               |             |             |             |
| Cl      | 0.00000000  | -5.06339400 | 1.61505000  |                               |             |             |             |
| H       | 0.00000000  | 2.35436000  | -2.47284400 |                               |             |             |             |
| H       | 0.00000000  | 2.35436000  | 2.47284400  |                               |             |             |             |
| H       | 0.00000000  | -2.35436000 | 2.47284400  |                               |             |             |             |
| H       | 0.00000000  | -2.35436000 | -2.47284400 |                               |             |             |             |
| TS1     |             |             |             | TS2                           |             |             |             |
| C       | -4.05553500 | -0.73295300 | 0.06731600  | C                             | -4.04797400 | -0.73815000 | 0.04008500  |
| C       | -2.81973100 | -1.37546100 | 0.13175900  | C                             | -2.81087500 | -1.37880100 | 0.09772600  |
| C       | -1.64909000 | -0.63789200 | 0.07880300  | C                             | -1.64150600 | -0.63734600 | 0.07639400  |
| C       | -1.70057300 | 0.75155100  | -0.04226600 | C                             | -1.69566100 | 0.75524900  | -0.00799800 |
| C       | -2.92597000 | 1.39457700  | -0.10794400 | C                             | -2.92288400 | 1.39593800  | -0.06759900 |
| C       | -4.10822000 | 0.65774800  | -0.05292400 | C                             | -4.10355600 | 0.65500100  | -0.04244300 |
| C       | 0.63806300  | 0.83522000  | -0.05270400 | C                             | 0.64273400  | 0.84425500  | -0.01533700 |
| C       | 0.68947000  | -0.55766300 | 0.06525900  | C                             | 0.69619000  | -0.54841300 | 0.07006700  |
| C       | 1.81117700  | 1.56630000  | -0.12004400 | C                             | 1.81450000  | 1.57981300  | -0.08135500 |
| C       | 1.90709200  | -1.21894700 | 0.10340800  | C                             | 1.91847700  | -1.20474100 | 0.08471000  |
| C       | 3.04269800  | 0.91390300  | -0.07199800 | C                             | 3.05472500  | 0.94095400  | -0.05775900 |
| C       | 3.06607600  | -0.47092400 | -0.02596400 | C                             | 3.07003400  | -0.44576700 | -0.03491500 |
| O       | -0.56081500 | 1.51986400  | -0.09632600 | O                             | -0.55895800 | 1.52806000  | -0.03029500 |
| O       | -0.45165800 | -1.31899100 | 0.15053900  | O                             | -0.44346400 | -1.31691000 | 0.14439600  |
| Cl      | -5.62682000 | 1.51313200  | -0.13717500 | Cl                            | -5.62402100 | 1.50861200  | -0.11631000 |
| Cl      | -5.50380300 | -1.70301000 | 0.13951500  | Cl                            | -5.49421900 | -1.71409300 | 0.07300000  |
| Cl      | 4.53007300  | 1.84239700  | -0.12479400 | Cl                            | 4.52085500  | 1.87573200  | -0.13462600 |
| Cl      | 4.48510500  | -1.42124600 | -1.54240200 | Cl                            | 4.51341600  | -1.35855800 | -1.58281500 |
| H       | -2.95372700 | 2.47191500  | -0.20157500 | H                             | -2.95283100 | 2.47531200  | -0.13291100 |
| H       | -2.76353500 | -2.45188700 | 0.22411300  | H                             | -2.75270100 | -2.45728100 | 0.16009500  |
| H       | 1.93924400  | -2.29648300 | 0.18234800  | H                             | 1.95599100  | -2.28435500 | 0.12560400  |
| H       | 1.76580100  | 2.64433400  | -0.20499500 | H                             | 1.76315600  | 2.65893900  | -0.14821500 |
| H       | 4.91605400  | 0.51491900  | 1.83709300  | H                             | 4.29814700  | -1.05338500 | 2.85178200  |
| O       | 4.74624900  | -0.37769200 | 2.19822000  | O                             | 4.66922300  | -0.43255700 | 2.20456500  |
| O       | 4.34081300  | -1.11606100 | 1.02957100  | O                             | 4.35090300  | -1.13671000 | 0.97575100  |
| H       | 5.08927900  | -1.22413400 | 0.37332500  | H                             | 5.12886200  | -1.08102100 | 0.35161500  |
| TS3     |             |             |             | TS4                           |             |             |             |
| C       | -3.98623300 | -0.74402900 | -0.04180000 | C                             | -4.00173900 | -0.75408300 | -0.04494200 |
| C       | -2.73894300 | -1.36684800 | -0.01146400 | C                             | -2.75131700 | -1.37105700 | -0.03494700 |

|         |             |             |             |         |             |             |             |
|---------|-------------|-------------|-------------|---------|-------------|-------------|-------------|
| C       | -1.58406100 | -0.60575400 | 0.04389600  | C       | -1.59834700 | -0.60590800 | 0.01831500  |
| C       | -1.66040400 | 0.78758300  | 0.06563700  | C       | -1.68263600 | 0.78691600  | 0.05983900  |
| C       | -2.89734700 | 1.41090800  | 0.03262000  | C       | -2.92287800 | 1.40449300  | 0.04682700  |
| C       | -4.06484400 | 0.65057000  | -0.01869100 | C       | -4.08724100 | 0.63941600  | -0.00376000 |
| C       | 0.67502000  | 0.91329100  | 0.08277600  | C       | 0.65349000  | 0.92669300  | 0.07612800  |
| C       | 0.75053000  | -0.47863600 | 0.07601400  | C       | 0.73672500  | -0.46692100 | 0.03755400  |
| C       | 1.83769700  | 1.66855800  | 0.05529400  | C       | 1.80827800  | 1.69138700  | 0.08533400  |
| C       | 1.98701700  | -1.11669300 | 0.03870900  | C       | 1.97316100  | -1.09641100 | -0.00258300 |
| C       | 3.08803000  | 1.05390500  | 0.02635800  | C       | 3.06292200  | 1.07947200  | 0.05311300  |
| C       | 3.13558100  | -0.33500200 | -0.04365300 | C       | 3.10107900  | -0.30080300 | -0.04936000 |
| O       | -0.53609100 | 1.57761100  | 0.12317100  | O       | -0.56252500 | 1.58258000  | 0.11704100  |
| O       | -0.37255200 | -1.26902500 | 0.08488700  | O       | -0.38599300 | -1.26277400 | 0.03531700  |
| Cl      | -5.59815900 | 1.48170600  | -0.05454100 | Cl      | -5.62533500 | 1.46406300  | -0.01505200 |
| Cl      | -5.41478700 | -1.74267000 | -0.10758200 | Cl      | -5.42659200 | -1.75933500 | -0.10872800 |
| Cl      | 4.53464600  | 2.01560700  | 0.02477700  | Cl      | 4.50923700  | 2.04492400  | 0.09373200  |
| Cl      | 4.51000500  | -1.18214100 | -1.65793100 | Cl      | 4.56383500  | -1.08428200 | -1.67390500 |
| H       | -2.94547000 | 2.49147300  | 0.04883400  | H       | -2.97588000 | 2.48452000  | 0.07731400  |
| H       | -2.66268700 | -2.44587100 | -0.02985200 | H       | -2.66987900 | -2.44935700 | -0.06752300 |
| H       | 2.02317800  | -2.19319500 | -0.07249800 | H       | 2.02983700  | -2.17479700 | -0.04930800 |
| H       | 1.76857700  | 2.74878400  | 0.07262300  | H       | 1.73341700  | 2.77057100  | 0.12414200  |
| H       | 3.03477100  | -1.64789500 | 2.01613100  | H       | 4.25450800  | -1.38968600 | 2.75855200  |
| O       | 4.00333800  | -1.60429600 | 2.15573100  | O       | 4.06213900  | -1.91379500 | 1.96518300  |
| O       | 4.42926600  | -0.96269800 | 0.93014600  | O       | 4.46635800  | -0.98605100 | 0.94364200  |
| H       | 4.79869200  | -1.64570600 | 0.29879700  | H       | 4.87972700  | -1.51138000 | 0.18545000  |
| IM1(0w) |             |             |             | TS1(0w) |             |             |             |
| C       | 4.13791100  | 0.63936800  | 0.20817000  | C       | -4.05553500 | -0.73295300 | 0.06731600  |
| C       | 2.95035400  | 1.36954800  | 0.17588300  | C       | -2.81973100 | -1.37546100 | 0.13175900  |
| C       | 1.74393000  | 0.72558800  | -0.04082900 | C       | -1.64909000 | -0.63789200 | 0.07880300  |
| C       | 1.71304600  | -0.65684100 | -0.22856100 | C       | -1.70057300 | 0.75155100  | -0.04226600 |
| C       | 2.88902300  | -1.38727700 | -0.19790700 | C       | -2.92597000 | 1.39457700  | -0.10794400 |
| C       | 4.10710400  | -0.74449500 | 0.02064300  | C       | -4.10822000 | 0.65774800  | -0.05292400 |
| C       | -0.61098700 | -0.57068900 | -0.48159300 | C       | 0.63806300  | 0.83522000  | -0.05270400 |
| C       | -0.58051600 | 0.81228700  | -0.29338800 | C       | 0.68947000  | -0.55766300 | 0.06525900  |
| C       | -1.81625500 | -1.21212600 | -0.71381000 | C       | 1.81117700  | 1.56630000  | -0.12004400 |
| C       | -1.75483900 | 1.54548100  | -0.33677900 | C       | 1.90709200  | -1.21894700 | 0.10340800  |
| C       | -2.99804500 | -0.47664800 | -0.75771700 | C       | 3.04269800  | 0.91390300  | -0.07199800 |
| C       | -2.97119400 | 0.90498500  | -0.56631400 | C       | 3.06607600  | -0.47092400 | -0.02596400 |
| O       | 0.53330100  | -1.33524300 | -0.44637000 | O       | -0.56081500 | 1.51986400  | -0.09632600 |
| O       | 0.59599400  | 1.48862000  | -0.06251200 | O       | -0.45165800 | -1.31899100 | 0.15053900  |
| Cl      | 5.56223800  | -1.70605300 | 0.05118500  | Cl      | -5.62682000 | 1.51313200  | -0.13717500 |
| Cl      | 5.63338800  | 1.49399600  | 0.48517000  | Cl      | -5.50380300 | -1.70301000 | 0.13951500  |
| Cl      | -4.49674100 | -1.33144300 | -1.05692100 | Cl      | 4.53007300  | 1.84239700  | -0.12479400 |
| Cl      | -4.42685600 | 1.86685100  | -0.60738100 | Cl      | 4.48510500  | -1.42124600 | -1.54240200 |
| H       | 2.85097100  | -2.45851700 | -0.34401500 | H       | -2.95372700 | 2.47191500  | -0.20157500 |
| H       | 2.95999500  | 2.44162400  | 0.32002100  | H       | -2.76353500 | -2.45188700 | 0.22411300  |
| H       | -1.71576000 | 2.61638400  | -0.18862000 | H       | 1.93924400  | -2.29648300 | 0.18234800  |
| H       | -1.82714400 | -2.28440400 | -0.85595400 | H       | 1.76580100  | 2.64433400  | -0.20499500 |
| H       | -5.42250100 | -1.31222700 | 1.34389900  | H       | 4.91605400  | 0.51491900  | 1.83709300  |
| O       | -5.57816100 | -1.18552000 | 2.29290500  | O       | 4.74624900  | -0.37769200 | 2.19822000  |
| O       | -4.47335000 | -0.30571300 | 2.63150900  | O       | 4.34081300  | -1.11606100 | 1.02957100  |
| H       | -4.94952900 | 0.50792900  | 2.84869900  | H       | 5.08927900  | -1.22413400 | 0.37332500  |
| IM2(0w) |             |             |             | TS2(0w) |             |             |             |
| C       | 3.99569400  | 0.90666300  | 0.11483800  | C       | 3.88757100  | 0.73753400  | -0.18913500 |
| C       | 2.69439800  | 1.39308800  | 0.23787800  | C       | 2.62436200  | 1.24725700  | -0.48797600 |
| C       | 1.61720600  | 0.52911800  | 0.13602100  | C       | 1.50489500  | 0.44267700  | -0.35471600 |
| C       | 1.83195900  | -0.83005200 | -0.09160700 | C       | 1.64914700  | -0.87262600 | 0.07872800  |
| C       | 3.12062000  | -1.31996400 | -0.21471500 | C       | 2.89584200  | -1.39001200 | 0.37986900  |

|         |             |             |             |         |             |             |             |
|---------|-------------|-------------|-------------|---------|-------------|-------------|-------------|
| C       | 4.20986200  | -0.45501100 | -0.11240900 | C       | 4.02607900  | -0.58561400 | 0.24623600  |
| C       | -0.47925200 | -1.19970300 | -0.07709200 | C       | -0.66657700 | -1.18409700 | -0.05676600 |
| C       | -0.69421700 | 0.16288400  | 0.14856700  | C       | -0.81630200 | 0.15044800  | -0.50020400 |
| C       | -1.55299000 | -2.07387900 | -0.18884300 | C       | -1.77075400 | -2.02530600 | 0.10933600  |
| C       | -1.98615600 | 0.64718200  | 0.26841900  | C       | -2.06577700 | 0.63715600  | -0.76926900 |
| C       | -2.84862700 | -1.58524200 | -0.07770300 | C       | -3.03463900 | -1.54418000 | -0.15807000 |
| C       | -3.06847000 | -0.22242000 | 0.14525600  | C       | -3.21717500 | -0.20046000 | -0.64267200 |
| O       | 0.78468900  | -1.72320700 | -0.19926900 | O       | 0.54673100  | -1.70353700 | 0.22270900  |
| O       | 0.34921800  | 1.05302800  | 0.26462300  | O       | 0.27557500  | 0.97123200  | -0.66042200 |
| Cl      | 5.81570500  | -1.11610400 | -0.27416800 | Cl      | 5.58280400  | -1.26554900 | 0.63117800  |
| Cl      | 5.32090700  | 2.03191000  | 0.25101500  | Cl      | 5.26702300  | 1.78338900  | -0.36997600 |
| Cl      | -4.20162900 | -2.68057400 | -0.22568700 | Cl      | -4.41076400 | -2.55454600 | 0.06795800  |
| Cl      | -5.05167000 | 3.32154700  | -0.76277700 | Cl      | -3.59611400 | 3.29951700  | 0.89890800  |
| H       | 3.27193800  | -2.37658300 | -0.39061800 | H       | 2.98304100  | -2.41436900 | 0.71644700  |
| H       | 2.51446300  | 2.44527200  | 0.41362100  | H       | 2.50621000  | 2.26952100  | -0.82161700 |
| H       | -2.15558800 | 1.70150200  | 0.44641500  | H       | -2.20885900 | 1.66500800  | -1.07628300 |
| H       | -1.36392000 | -3.12409400 | -0.36661300 | H       | -1.60849600 | -3.03743700 | 0.45480300  |
| H       | -5.53706500 | -0.62785000 | 1.35624700  | H       | -5.98447500 | 1.25151200  | 0.09536800  |
| O       | -4.90954100 | 0.08918000  | 1.54189800  | O       | -5.15762600 | 1.01921400  | 0.54461900  |
| O       | -4.34263900 | 0.29270800  | 0.18753200  | O       | -4.37368300 | 0.23774700  | -0.96724600 |
| H       | -4.84011500 | 2.10686100  | -0.35148600 | H       | -4.44556000 | 2.12408000  | 0.70468100  |
| IM1(1w) |             |             |             | TS1(1w) |             |             |             |
| C       | -4.05964600 | -0.72613200 | -0.18366300 | C       | -4.34987100 | -0.76511900 | 0.03673600  |
| C       | -2.84698300 | -1.34977000 | -0.47585100 | C       | -3.10238800 | -1.38694500 | 0.06533500  |
| C       | -1.67547400 | -0.61272100 | -0.49944200 | C       | -1.94463800 | -0.62762700 | 0.02918100  |
| C       | -1.70508900 | 0.75526800  | -0.22960000 | C       | -2.02138300 | 0.76496700  | -0.03880400 |
| C       | -2.90457700 | 1.38011000  | 0.06402200  | C       | -3.25963100 | 1.38706600  | -0.06785800 |
| C       | -4.08866800 | 0.64377200  | 0.08749000  | C       | -4.42797200 | 0.62778900  | -0.03009400 |
| C       | 0.61645700  | 0.85803400  | -0.49423700 | C       | 0.31524900  | 0.88804400  | -0.05701500 |
| C       | 0.64514100  | -0.51194400 | -0.76497900 | C       | 0.39331100  | -0.50824200 | 0.00601900  |
| C       | 1.79502800  | 1.58696900  | -0.47100800 | C       | 1.47722900  | 1.63272000  | -0.09675300 |
| C       | 1.85241100  | -1.14461600 | -1.00489400 | C       | 1.61718300  | -1.14912000 | 0.02454000  |
| C       | 3.01589600  | 0.95327500  | -0.70928300 | C       | 2.72279400  | 0.99877000  | -0.06831200 |
| C       | 3.03990100  | -0.41683100 | -0.97024000 | C       | 2.79049700  | -0.39707700 | -0.07995600 |
| O       | -0.55949000 | 1.52471000  | -0.25009500 | O       | -0.89803000 | 1.55435800  | -0.07654000 |
| O       | -0.50085300 | -1.26867100 | -0.80090200 | O       | -0.73668700 | -1.29083900 | 0.06156700  |
| Cl      | -5.57726900 | 1.47331600  | 0.46029100  | Cl      | -5.96270400 | 1.45899300  | -0.06756100 |
| Cl      | -5.51071200 | -1.69401200 | -0.16826100 | Cl      | -5.78059900 | -1.76349300 | 0.08504500  |
| Cl      | 4.47541300  | 1.90867400  | -0.66670300 | Cl      | 4.17793200  | 1.98321300  | -0.15198000 |
| Cl      | 4.54629100  | -1.27002900 | -1.24187900 | Cl      | 4.08206000  | -1.23094600 | -1.64179000 |
| H       | -2.91253200 | 2.44111500  | 0.27458800  | H       | -3.30744600 | 2.46647800  | -0.12049100 |
| H       | -2.81009400 | -2.41054700 | -0.68478900 | H       | -3.02618800 | -2.46494400 | 0.11584000  |
| H       | 1.86177400  | -2.20826000 | -1.20184000 | H       | 1.66190100  | -2.22834800 | 0.06775800  |
| H       | 1.75525600  | 2.65189200  | -0.28136300 | H       | 1.41869800  | 2.71201000  | -0.15352500 |
| H       | 2.23607300  | 1.19872100  | 2.21342600  | H       | 3.43384500  | 0.38087000  | 2.17266400  |
| O       | 2.42271300  | 0.67343100  | 3.00425600  | O       | 3.77437100  | -0.51889600 | 2.34028200  |
| O       | 1.86632900  | -0.61271900 | 2.61750500  | O       | 3.95233200  | -1.02693500 | 0.99876800  |
| H       | 2.68731600  | -1.13501800 | 2.50411900  | H       | 4.94177200  | -0.81368200 | 0.75302500  |
| O       | 4.33510000  | -1.91458200 | 2.22922900  | O       | 6.38673900  | -0.68977300 | 0.33254900  |
| H       | 4.99442200  | -1.54555200 | 2.82659600  | H       | 6.76872200  | 0.19389100  | 0.38178000  |
| H       | 4.69773300  | -1.80732800 | 1.34080100  | H       | 6.23290100  | -0.87296200 | -0.61129900 |
| IM2(1w) |             |             |             | TS2(1w) |             |             |             |
| C       | 4.07649400  | 0.98767200  | 0.26456400  | C       | 3.82690500  | 0.51626300  | -0.47808400 |
| C       | 2.73864000  | 1.30066200  | 0.50382900  | C       | 2.62391100  | 1.00568500  | -0.98483600 |
| C       | 1.75344500  | 0.35346700  | 0.28208100  | C       | 1.45213000  | 0.29755400  | -0.78072300 |
| C       | 2.09754300  | -0.91515200 | -0.18390500 | C       | 1.48467500  | -0.89743500 | -0.06873200 |
| C       | 3.42298200  | -1.23303400 | -0.42405300 | C       | 2.66936100  | -1.39231300 | 0.44430500  |

|         |             |             |             |         |             |             |             |
|---------|-------------|-------------|-------------|---------|-------------|-------------|-------------|
| C       | 4.42027500  | -0.28392000 | -0.20085300 | C       | 3.85214800  | -0.68563000 | 0.24023800  |
| C       | -0.16150200 | -1.52745800 | -0.18935500 | C       | -0.83278200 | -1.10335200 | -0.27053800 |
| C       | -0.50592200 | -0.25544200 | 0.27731700  | C       | -0.87328500 | 0.12145100  | -0.99427100 |
| C       | -1.14458600 | -2.47675500 | -0.43990200 | C       | -1.99790100 | -1.81618300 | 0.02805700  |
| C       | -1.83513800 | 0.06219600  | 0.50185700  | C       | -2.07438700 | 0.64742900  | -1.35376700 |
| C       | -2.47812800 | -2.15408700 | -0.22513300 | C       | -3.21732100 | -1.28918800 | -0.32647700 |
| C       | -2.82653300 | -0.88289500 | 0.24167400  | C       | -3.30357700 | -0.02230100 | -1.03076500 |
| O       | 1.14373000  | -1.88622300 | -0.41825800 | O       | 0.32649600  | -1.62965000 | 0.14004600  |
| O       | 0.44523500  | 0.70481600  | 0.53424500  | O       | 0.28422800  | 0.78573700  | -1.30773800 |
| Cl      | 6.07716600  | -0.72758000 | -0.51677900 | Cl      | 5.33253600  | -1.33146200 | 0.89265700  |
| Cl      | 5.28270100  | 2.21207100  | 0.55851300  | Cl      | 5.27845800  | 1.43513600  | -0.76032400 |
| Cl      | -3.71864300 | -3.34226800 | -0.54904200 | Cl      | -4.66920500 | -2.10677700 | 0.08901900  |
| Cl      | -4.54397100 | 4.37566800  | -1.32946200 | Cl      | -0.93508000 | 1.22578900  | 2.18987500  |
| H       | 3.67480000  | -2.22118800 | -0.78531200 | H       | 2.66644100  | -2.31893200 | 1.00220700  |
| H       | 2.45852400  | 2.28199000  | 0.86279300  | H       | 2.59432300  | 1.93689600  | -1.53412500 |
| H       | -2.10594300 | 1.04637200  | 0.86444000  | H       | -2.13138600 | 1.60521600  | -1.85367200 |
| H       | -0.85647600 | -3.45336800 | -0.80520800 | H       | -1.91338300 | -2.74431000 | 0.57671600  |
| H       | -5.18059700 | -1.80687600 | 1.35172100  | H       | -5.61413800 | 2.09589700  | -0.23559900 |
| O       | -4.66614400 | -1.05063700 | 1.67748400  | O       | -4.96584600 | 1.59754600  | 0.27858600  |
| O       | -4.14504600 | -0.51762700 | 0.39087900  | O       | -4.41751100 | 0.50367500  | -1.30189800 |
| H       | -4.55688100 | 1.33984500  | 0.73674200  | H       | -3.13305500 | 3.49356900  | 1.64829300  |
| O       | -4.50134200 | 2.28197700  | 0.96652300  | O       | -2.90543800 | 2.80174400  | 1.01690700  |
| H       | -5.10239000 | 2.41469900  | 1.70653200  | H       | -3.79375800 | 2.32382600  | 0.69910000  |
| H       | -4.54122900 | 3.48438500  | -0.36235800 | H       | -2.02381200 | 2.05786300  | 1.55254100  |
| IM1(2w) |             |             |             | TS1(2w) |             |             |             |
| C       | 4.03332400  | -0.70940900 | -0.52483600 | C       | -4.70086400 | -0.76531500 | -0.02644800 |
| C       | 2.81187600  | -1.19101900 | -0.99442200 | C       | -3.45398900 | -1.38698200 | 0.02298000  |
| C       | 1.63168700  | -0.79754800 | -0.38802900 | C       | -2.29570200 | -0.62731000 | 0.02202400  |
| C       | 1.66398100  | 0.07658000  | 0.69651900  | C       | -2.37174200 | 0.76636300  | -0.03116300 |
| C       | 2.87146300  | 0.55245100  | 1.17401400  | C       | -3.60977800 | 1.38804000  | -0.08076200 |
| C       | 4.06417800  | 0.16445300  | 0.56395400  | C       | -4.77823000 | 0.62813700  | -0.07828500 |
| C       | -0.66001000 | -0.12205600 | 0.91873300  | C       | -0.03524200 | 0.88943500  | -0.00135900 |
| C       | -0.68484500 | -0.99020000 | -0.17415200 | C       | 0.04244000  | -0.50696100 | 0.04788700  |
| C       | -1.82051200 | 0.15378100  | 1.61964800  | C       | 1.12753600  | 1.63328300  | -0.01317600 |
| C       | -1.88122900 | -1.56312700 | -0.57138100 | C       | 1.26547400  | -1.14823700 | 0.08041000  |
| C       | -3.03046000 | -0.41270400 | 1.21916100  | C       | 2.37372000  | 0.99967200  | 0.02927400  |
| C       | -3.05587700 | -1.26699500 | 0.11723200  | C       | 2.44443700  | -0.39755600 | 0.01192300  |
| O       | 0.50176300  | 0.50546900  | 1.31600600  | O       | -1.24929200 | 1.55646200  | -0.03389500 |
| O       | 0.44712000  | -1.29318600 | -0.88713800 | O       | -1.08920200 | -1.29071200 | 0.07420400  |
| Cl      | 5.56445200  | 0.79137800  | 1.19534300  | Cl      | -6.31246600 | 1.45952200  | -0.14059400 |
| Cl      | 5.49466600  | -1.22794500 | -1.32446600 | Cl      | -6.13201700 | -1.76490500 | -0.02238600 |
| Cl      | -4.47572500 | -0.02075000 | 2.11522900  | Cl      | 3.82990000  | 1.97904600  | -0.03213800 |
| Cl      | -4.55557400 | -1.97455000 | -0.45593500 | Cl      | 3.76038700  | -1.22777200 | -1.47685600 |
| H       | 2.88232500  | 1.23113200  | 2.01639200  | H       | -3.65695900 | 2.46799700  | -0.12156400 |
| H       | 2.77477200  | -1.86716600 | -1.83792600 | H       | -3.37842600 | -2.46548700 | 0.06247200  |
| H       | -1.89271300 | -2.22583800 | -1.42621300 | H       | 1.30816400  | -2.22791400 | 0.11383600  |
| H       | -1.78359800 | 0.82493800  | 2.46732800  | H       | 1.07101600  | 2.71316900  | -0.06057900 |
| H       | 0.16725500  | 2.55778200  | 0.62853700  | H       | 2.84782700  | 0.31857700  | 2.28398100  |
| O       | 0.00017600  | 3.16006900  | -0.11131500 | O       | 3.24964500  | -0.55046400 | 2.47760900  |
| O       | -0.09800100 | 2.20838700  | -1.20812900 | O       | 3.56403000  | -1.03100400 | 1.15086200  |
| H       | -1.02014100 | 2.37337600  | -1.50750000 | H       | 4.59612000  | -0.78176100 | 1.03852500  |
| O       | -2.68739000 | 2.79052900  | -1.98279800 | O       | 6.00770800  | -0.54966100 | 1.11054600  |
| H       | -2.98479800 | 3.61630500  | -1.58953300 | H       | 6.26755200  | 0.16700600  | 1.69852900  |
| H       | -3.46260900 | 2.20001900  | -1.99823400 | H       | 6.40382400  | -0.36424700 | 0.22062600  |
| O       | -4.96975600 | 1.13056500  | -2.13288900 | O       | 6.74113200  | -0.05641100 | -1.40990300 |
| H       | -5.31153100 | 0.94716700  | -3.01389600 | H       | 7.36425000  | -0.59511900 | -1.90828200 |
| H       | -5.05465100 | 0.30409200  | -1.64042300 | H       | 5.85742500  | -0.27347000 | -1.75920800 |

| IM2(2w) |             |             |             | TS2(2w) |             |             |             |
|---------|-------------|-------------|-------------|---------|-------------|-------------|-------------|
| C       | -4.06342100 | 0.52420600  | -0.62539400 | C       | 3.76266200  | 0.09976700  | -0.11496400 |
| C       | -2.78867700 | 0.89331400  | -1.05395900 | C       | 2.53234200  | 0.68613400  | -0.40709600 |
| C       | -1.68691000 | 0.14118100  | -0.68444800 | C       | 1.38080100  | -0.08316300 | -0.36127400 |
| C       | -1.84998700 | -0.98614200 | 0.11996000  | C       | 1.46157000  | -1.42780900 | -0.01263900 |
| C       | -3.11153100 | -1.35704800 | 0.55131500  | C       | 2.67518200  | -2.02305400 | 0.28207500  |
| C       | -4.22584400 | -0.60490400 | 0.18026300  | C       | 3.83747400  | -1.25887400 | 0.22762900  |
| C       | 0.46308700  | -1.33759400 | 0.10099000  | C       | -0.86592200 | -1.62967500 | -0.17762100 |
| C       | 0.62578900  | -0.20573400 | -0.70317900 | C       | -0.95247800 | -0.25388200 | -0.55031000 |
| C       | 1.56527400  | -2.07018700 | 0.52130600  | C       | -2.00739800 | -2.43084500 | -0.03357700 |
| C       | 1.89492400  | 0.19355000  | -1.08112300 | C       | -2.16511400 | 0.31493400  | -0.77040800 |
| C       | 2.83903400  | -1.66374000 | 0.14612100  | C       | -3.24303800 | -1.87605800 | -0.25002000 |
| C       | 3.00699300  | -0.52437000 | -0.64478100 | C       | -3.38787000 | -0.46370000 | -0.67007200 |
| O       | -0.77708200 | -1.76439500 | 0.50454000  | O       | 0.31390100  | -2.20984700 | 0.05908000  |
| O       | -0.44774200 | 0.53525200  | -1.13866900 | O       | 0.18461800  | 0.50363100  | -0.67109100 |
| Cl      | -5.79736400 | -1.11117400 | 0.74433100  | Cl      | 5.35592100  | -2.02718200 | 0.59814200  |
| Cl      | -5.42218400 | 1.50095500  | -1.11906700 | Cl      | 5.18884500  | 1.09106800  | -0.18394100 |
| Cl      | 4.23332200  | -2.57918600 | 0.67057000  | Cl      | -4.66321200 | -2.80742100 | -0.06881900 |
| Cl      | 1.06903900  | 1.82969300  | 2.49372300  | Cl      | 0.74302300  | 4.18868600  | -0.00642800 |
| H       | -3.22203900 | -2.23247400 | 1.17710300  | H       | 2.71103200  | -3.07004900 | 0.55142900  |
| H       | -2.64920100 | 1.76707200  | -1.67616700 | H       | 2.45252100  | 1.73705600  | -0.65522200 |
| H       | 2.02496500  | 1.07264700  | -1.69910500 | H       | -2.24549200 | 1.36744700  | -1.02145700 |
| H       | 1.41611000  | -2.94003800 | 1.14666300  | H       | -1.88374200 | -3.46302100 | 0.26611200  |
| H       | 5.35002700  | -1.41448700 | -1.72502500 | H       | -5.12047000 | 0.21066500  | 2.04580900  |
| O       | 4.79669400  | -0.73638700 | -2.14601800 | O       | -4.40885400 | 0.38033100  | 1.41272100  |
| O       | 4.26442200  | -0.05100800 | -0.94120200 | O       | -4.49089100 | 0.02757600  | -0.89737600 |
| H       | 4.62995200  | 1.80544800  | -0.91434900 | H       | -3.98663200 | 1.91838000  | 1.48311700  |
| O       | 4.66187000  | 2.76885200  | -0.78307700 | O       | -3.65352500 | 2.87693800  | 1.50308100  |
| H       | 5.59421900  | 3.00535000  | -0.76152000 | H       | -3.37629900 | 3.05407900  | 2.40601600  |
| H       | 3.55761400  | 3.43944600  | 0.45458800  | H       | -2.69911500 | 3.35062000  | 0.27997900  |
| O       | 2.93659700  | 3.79104700  | 1.12733900  | O       | -2.13161300 | 3.57313400  | -0.51616300 |
| H       | 2.51194000  | 4.55993200  | 0.73475500  | H       | -2.59045600 | 4.27430600  | -0.99011800 |
| H       | 1.88812300  | 2.69013200  | 1.89489200  | H       | -0.55752700 | 3.91618400  | -0.22026000 |
| IM1(3w) |             |             |             | TS1(3w) |             |             |             |
| C       | -4.20027400 | 0.04410800  | 0.68956800  | C       | 5.03506500  | -0.73107700 | 0.19677100  |
| C       | -2.99567000 | 0.09122600  | 1.39059300  | C       | 3.79448400  | -1.36690400 | 0.21186600  |
| C       | -1.83268700 | -0.36916000 | 0.80115200  | C       | 2.63025400  | -0.62811400 | 0.07831200  |
| C       | -1.86049800 | -0.87968900 | -0.49562900 | C       | 2.69434400  | 0.75944800  | -0.07120400 |
| C       | -3.05096700 | -0.92694100 | -1.19842400 | C       | 3.92638500  | 1.39503000  | -0.08639400 |
| C       | -4.22830000 | -0.46629200 | -0.60865400 | C       | 5.10045100  | 0.65585200  | 0.04728400  |
| C       | 0.44656000  | -1.23280200 | -0.40848100 | C       | 0.35900000  | 0.84852400  | -0.18922700 |
| C       | 0.47447600  | -0.72011800 | 0.89152300  | C       | 0.29287000  | -0.54036400 | -0.03287100 |
| C       | 1.62030000  | -1.64150000 | -1.01852700 | C       | -0.80884000 | 1.57033400  | -0.33313700 |
| C       | 1.67626800  | -0.61979000 | 1.57111300  | C       | -0.92311200 | -1.19496100 | -0.01373500 |
| C       | 2.83200000  | -1.54397200 | -0.33583300 | C       | -2.04756900 | 0.92095100  | -0.32831400 |
| C       | 2.85864700  | -1.03308700 | 0.96012900  | C       | -2.11111100 | -0.46006100 | -0.10852400 |
| O       | -0.72345500 | -1.35610600 | -1.11230200 | O       | 1.56672800  | 1.52927200  | -0.20705800 |
| O       | -0.66649600 | -0.31292100 | 1.53315800  | O       | 1.43089100  | -1.30506900 | 0.10090800  |
| Cl      | -5.70894600 | -0.54714300 | -1.53274800 | Cl      | 6.62647900  | 1.50459300  | 0.02209500  |
| Cl      | -5.64400800 | 0.63669500  | 1.47423800  | Cl      | 6.47392400  | -1.70531300 | 0.36753900  |
| Cl      | 4.29137100  | -2.07408500 | -1.15074600 | Cl      | -3.51272700 | 1.87718700  | -0.47882600 |
| Cl      | 4.35593500  | -0.88595500 | 1.86369700  | Cl      | -3.49713200 | -1.09179400 | 1.39350100  |
| H       | -3.05798800 | -1.32328500 | -2.20489300 | H       | 3.96422000  | 2.46991000  | -0.20229400 |
| H       | -2.95843000 | 0.49441000  | 2.39344200  | H       | 3.72834600  | -2.44057500 | 0.32710800  |
| H       | 1.68554000  | -0.21025700 | 2.57199900  | H       | -0.95624800 | -2.26811900 | 0.11222100  |
| H       | 1.58455500  | -2.03126600 | -2.02688500 | H       | -0.76252000 | 2.64579500  | -0.44668900 |
| H       | -1.50708100 | 3.02535700  | -1.48145300 | H       | -2.42215600 | -0.07254000 | -2.48337800 |

|         |             |             |             |         |             |             |             |
|---------|-------------|-------------|-------------|---------|-------------|-------------|-------------|
| O       | -1.23874400 | 2.76359600  | -0.59058400 | O       | -2.78688900 | -0.97483500 | -2.56450100 |
| O       | -0.15021700 | 1.84691700  | -0.88859800 | O       | -3.16996400 | -1.26324400 | -1.20197200 |
| H       | 0.61665600  | 2.34773200  | -0.52031300 | H       | -4.22346400 | -1.02801400 | -1.18339600 |
| O       | 1.91546400  | 3.24368400  | 0.21606600  | O       | -5.59457100 | -0.87677400 | -1.41876000 |
| H       | 1.65795300  | 4.07387800  | 0.62654300  | H       | -5.81812000 | -0.33964400 | -2.18528800 |
| H       | 2.75463700  | 3.41286000  | -0.26209600 | H       | -6.20702700 | -0.60989000 | -0.67782800 |
| O       | 4.31924400  | 3.48100800  | -1.10907200 | O       | -7.30724200 | -0.13903800 | 0.45878900  |
| H       | 4.91369900  | 4.22680900  | -1.22629000 | H       | -7.87232800 | -0.83315700 | 0.81130000  |
| H       | 4.88110900  | 2.69645500  | -0.94531200 | H       | -6.87143400 | 0.28382000  | 1.23262300  |
| H       | 5.63836500  | 0.44931300  | -1.24233700 | H       | -5.83460600 | 0.98588700  | 3.37824700  |
| O       | 5.76654900  | 1.16594000  | -0.60958100 | O       | -5.76303500 | 0.95416500  | 2.41967400  |
| H       | 5.56913400  | 0.76744500  | 0.24821600  | H       | -4.92457400 | 0.49931200  | 2.22250800  |
| IM2(3w) |             |             |             | TS2(3w) |             |             |             |
| C       | 4.21118300  | 0.41816400  | 0.68592700  | C       | 3.68679900  | -0.32293600 | -0.04653000 |
| C       | 2.94021000  | 0.54999500  | 1.24459100  | C       | 2.47524200  | 0.30608800  | -0.33053300 |
| C       | 1.87790500  | -0.17375400 | 0.73087600  | C       | 1.30694400  | -0.43925100 | -0.33317500 |
| C       | 2.07668700  | -1.03224800 | -0.34985000 | C       | 1.34988600  | -1.79820400 | -0.03749200 |
| C       | 3.33393300  | -1.16524600 | -0.91227300 | C       | 2.54558000  | -2.43311900 | 0.24809000  |
| C       | 4.40928200  | -0.44280700 | -0.39569100 | C       | 3.72593200  | -1.69539800 | 0.24069400  |
| C       | -0.20525500 | -1.54803600 | -0.36140700 | C       | -0.97938100 | -1.94086000 | -0.23078700 |
| C       | -0.40276300 | -0.68499000 | 0.72029900  | C       | -1.03118400 | -0.55316700 | -0.56234300 |
| C       | -1.27886300 | -2.21001000 | -0.94319800 | C       | -2.13993000 | -2.71633300 | -0.11446700 |
| C       | -1.67899900 | -0.47945900 | 1.21320800  | C       | -2.22987600 | 0.04350900  | -0.78401400 |
| C       | -2.55925900 | -2.00109500 | -0.44817800 | C       | -3.36343900 | -2.12355500 | -0.30601200 |
| C       | -2.76314800 | -1.12656800 | 0.62273300  | C       | -3.47235400 | -0.69857000 | -0.67594700 |
| O       | 1.04249900  | -1.77393000 | -0.88612000 | O       | 0.18587800  | -2.55666200 | -0.00754700 |
| O       | 0.64335600  | -0.02745700 | 1.32240900  | O       | 0.12321200  | 0.18814400  | -0.63515600 |
| Cl      | 5.97844600  | -0.64535400 | -1.13212700 | Cl      | 5.22044500  | -2.51409900 | 0.59931800  |
| Cl      | 5.52089400  | 1.34660400  | 1.36921500  | Cl      | 5.13717700  | 0.63632500  | -0.05397800 |
| Cl      | -3.91762500 | -2.82883700 | -1.17490900 | Cl      | -4.80572100 | -3.02417400 | -0.13840800 |
| Cl      | -0.97197800 | 2.49865000  | -1.34264700 | Cl      | -0.33653900 | 5.93454800  | 0.11085900  |
| H       | 3.47224700  | -1.83307700 | -1.75192700 | H       | 2.55280400  | -3.49041700 | 0.47631900  |
| H       | 2.77179600  | 1.21720700  | 2.07918300  | H       | 2.42543500  | 1.36952700  | -0.53957600 |
| H       | -1.83750800 | 0.20126900  | 2.03982500  | H       | -2.29364000 | 1.10011500  | -1.01387100 |
| H       | -1.10226000 | -2.87128000 | -1.78082600 | H       | -2.04248900 | -3.76001800 | 0.15333200  |
| H       | -5.04389800 | -2.40162700 | 1.46226100  | H       | -5.05938700 | 0.11444100  | 2.10692600  |
| O       | -4.48748600 | -1.85206500 | 2.03783700  | O       | -4.35049400 | 0.15644900  | 1.44976400  |
| O       | -4.03451300 | -0.83058300 | 1.05783700  | O       | -4.56402400 | -0.15063300 | -0.82668500 |
| H       | -4.36305100 | 0.90791400  | 1.74409600  | H       | -3.36702800 | 1.41681800  | 1.70002300  |
| O       | -4.29119800 | 1.84456600  | 1.99436200  | O       | -2.66673600 | 2.13020900  | 1.84747300  |
| H       | -4.99690300 | 2.02353600  | 2.62212400  | H       | -3.03017900 | 2.74194300  | 2.49401000  |
| H       | -3.53628900 | 3.01777500  | 0.87466300  | H       | -1.81764700 | 2.83517200  | 0.59497200  |
| O       | -3.06600400 | 3.62114800  | 0.26211400  | O       | -1.33725000 | 3.23682700  | -0.17985100 |
| H       | -1.91988300 | 3.01012700  | -0.45700400 | H       | -0.93439200 | 4.69638100  | 0.00078200  |
| H       | -3.65903100 | 3.80785100  | -0.48872600 | H       | -0.47299000 | 2.80680700  | -0.26504900 |
| H       | -4.01126900 | 4.53292000  | -2.97977400 | H       | 1.44321800  | 3.58406200  | -1.89782800 |
| O       | -3.91203500 | 3.77855600  | -2.39084100 | O       | 1.51762200  | 3.37423000  | -0.96027500 |
| H       | -3.06194500 | 3.37376000  | -2.61894500 | H       | 1.42416700  | 4.23321400  | -0.51917700 |
| P(0w)   |             |             |             | P(1w)   |             |             |             |
| C       | 3.71461000  | 0.89289900  | -0.00021700 | C       | 3.77614200  | 0.85056000  | 0.02327400  |
| C       | 2.42062300  | 1.40892800  | -0.00057600 | C       | 2.45149800  | 1.28093800  | 0.03808900  |
| C       | 1.33320000  | 0.54929200  | -0.00042900 | C       | 1.42267100  | 0.35190100  | 0.02304400  |
| C       | 1.53901200  | -0.82862000 | 0.00008600  | C       | 1.71814500  | -1.00937800 | -0.00690600 |
| C       | 2.82130300  | -1.35227800 | 0.00046100  | C       | 3.03178000  | -1.44825300 | -0.02190600 |
| C       | 3.91724700  | -0.49367900 | 0.00030800  | C       | 4.06897000  | -0.51962900 | -0.00675000 |
| C       | -0.77445000 | -1.18392500 | -0.00013500 | C       | -0.56753200 | -1.51360200 | -0.00850100 |
| C       | -0.99282600 | 0.22415200  | -0.00046000 | C       | -0.87646300 | -0.12279900 | 0.02321900  |



|                                                                                   |             |             |             |         |             |             |             |
|-----------------------------------------------------------------------------------|-------------|-------------|-------------|---------|-------------|-------------|-------------|
| C                                                                                 | -1.85015200 | -2.07363300 | -0.00003900 | C       | -1.58398900 | -2.47054300 | -0.02766200 |
| C                                                                                 | -2.25842200 | 0.72706300  | -0.00050900 | C       | -2.17156200 | 0.29928300  | 0.03897200  |
| C                                                                                 | -3.13711500 | -1.58541100 | -0.00018600 | C       | -2.89874000 | -2.06458300 | -0.01391600 |
| C                                                                                 | -3.41443800 | -0.14307200 | -0.00028500 | C       | -3.26871700 | -0.64315700 | 0.02289800  |
| O                                                                                 | 0.47552500  | -1.70888700 | 0.00023700  | O       | 0.71343600  | -1.95661900 | -0.02300200 |
| O                                                                                 | 0.07201100  | 1.09052400  | -0.00082600 | O       | 0.13015500  | 0.80904400  | 0.03851900  |
| Cl                                                                                | 5.51661200  | -1.18363900 | 0.00079000  | Cl      | 5.71039900  | -1.10285600 | -0.02623500 |
| Cl                                                                                | 5.05281600  | 2.00638000  | -0.00042200 | Cl      | 5.03880800  | 2.04914000  | 0.04302900  |
| Cl                                                                                | -4.47877200 | -2.67010200 | -0.00018400 | Cl      | -4.16853400 | -3.23479200 | -0.03758900 |
| Cl                                                                                | -5.13821000 | 3.32031200  | 0.00087700  | Cl      | -3.24103700 | 4.11206600  | -0.15430400 |
| H                                                                                 | 2.95931400  | -2.42522400 | 0.00085800  | H       | 3.23988900  | -2.50961400 | -0.04531500 |
| H                                                                                 | 2.25227500  | 2.47755600  | -0.00097600 | H       | 2.21235800  | 2.33572000  | 0.06137300  |
| H                                                                                 | -2.42149500 | 1.79751900  | -0.00071200 | H       | -2.39428000 | 1.35977100  | 0.05857900  |
| H                                                                                 | -1.64886200 | -3.13690600 | 0.00016200  | H       | -1.31528600 | -3.51844000 | -0.05284900 |
| O                                                                                 | -4.58205900 | 0.29170500  | -0.00019300 | O       | -4.46283200 | -0.28714500 | 0.03897800  |
| H                                                                                 | -4.96816900 | 2.00987400  | 0.00076400  | H       | -5.20183000 | 1.32122300  | 0.18745900  |
|                                                                                   |             |             |             | O       | -5.54266200 | 2.23893900  | 0.26407600  |
|                                                                                   |             |             |             | H       | -6.31527100 | 2.29472700  | -0.30663800 |
|                                                                                   |             |             |             | H       | -4.31738000 | 3.33795200  | 0.02237500  |
| P(2w)                                                                             |             |             |             | P(3w)   |             |             |             |
| C                                                                                 | -3.81013700 | 0.56458700  | -0.51959500 | C       | 4.03897900  | -1.16169000 | -0.05750300 |
| C                                                                                 | -2.54657000 | 0.96428800  | -0.94779600 | C       | 2.65861000  | -1.33823000 | -0.11138100 |
| C                                                                                 | -1.44120000 | 0.17536200  | -0.67130900 | C       | 1.81907500  | -0.23600100 | -0.05066200 |
| C                                                                                 | -1.59840500 | -1.01428500 | 0.03638900  | C       | 2.36119500  | 1.04268900  | 0.06208000  |
| C                                                                                 | -2.85005300 | -1.42015300 | 0.46860700  | C       | 3.73250800  | 1.22946800  | 0.11587200  |
| C                                                                                 | -3.96394300 | -0.63230900 | 0.19215600  | C       | 4.57960600  | 0.12647900  | 0.05672300  |
| C                                                                                 | 0.70713200  | -1.39407400 | -0.07099600 | C       | 0.20772000  | 1.95970100  | 0.06313700  |
| C                                                                                 | 0.87523300  | -0.17277800 | -0.78490900 | C       | -0.35154300 | 0.65334700  | -0.04967600 |
| C                                                                                 | 1.80617000  | -2.19405100 | 0.24618000  | C       | -0.61552800 | 3.08631900  | 0.11622300  |
| C                                                                                 | 2.11818600  | 0.24570800  | -1.14776500 | C       | -1.70149900 | 0.47382400  | -0.10543800 |
| C                                                                                 | 3.06945800  | -1.78711000 | -0.11624700 | C       | -1.98062400 | 2.92727300  | 0.05943900  |
| C                                                                                 | 3.29908400  | -0.51454200 | -0.81053100 | C       | -2.60238100 | 1.60093000  | -0.05388200 |
| O                                                                                 | -0.51656300 | -1.82148000 | 0.32239600  | O       | 1.54705900  | 2.15714000  | 0.12207100  |
| O                                                                                 | -0.21291500 | 0.59063700  | -1.11748600 | O       | 0.46800600  | -0.44354400 | -0.10276900 |
| Cl                                                                                | -5.52503300 | -1.17108600 | 0.74813800  | Cl      | 6.30072000  | 0.39317400  | 0.12702100  |
| Cl                                                                                | -5.17306400 | 1.58441400  | -0.88880400 | Cl      | 5.06016800  | -2.57002800 | -0.13561500 |
| Cl                                                                                | 4.44188600  | -2.76003900 | 0.27416400  | Cl      | -3.01664300 | 4.30996800  | 0.12223000  |
| Cl                                                                                | 1.14910200  | 1.87741600  | 2.26367400  | Cl      | -2.51439300 | -3.09106800 | -0.50105500 |
| H                                                                                 | -2.95019900 | -2.34579700 | 1.01927900  | H       | 4.13276400  | 2.23059200  | 0.20324700  |
| H                                                                                 | -2.41541000 | 1.88844800  | -1.49420400 | H       | 2.22626600  | -2.32610100 | -0.20085500 |
| H                                                                                 | 2.24492400  | 1.18234500  | -1.67497700 | H       | -2.10345700 | -0.53204400 | -0.19511900 |
| H                                                                                 | 1.64172100  | -3.11861000 | 0.78368900  | H       | -0.16129800 | 4.06477900  | 0.20101300  |
| O                                                                                 | 4.44974900  | -0.11192800 | -1.07537400 | O       | -3.84450000 | 1.48224800  | -0.10184200 |
| H                                                                                 | 4.80742200  | 1.62055500  | -1.10572500 | H       | -5.05709300 | 0.28769200  | -0.17971600 |
| O                                                                                 | 4.89862300  | 2.58998200  | -0.97340200 | O       | -5.83012300 | -0.32201900 | -0.26126800 |
| H                                                                                 | 5.84298300  | 2.76025300  | -0.90703500 | H       | -6.48712400 | 0.13386200  | -0.79543000 |
| H                                                                                 | 3.85227600  | 3.23437100  | 0.27542100  | H       | -5.54751500 | -1.81895200 | -0.45322100 |
| O                                                                                 | 3.23313200  | 3.60017800  | 0.94890900  | O       | -5.30594600 | -2.80137000 | -0.58384500 |
| H                                                                                 | 2.90187800  | 4.43034000  | 0.59330800  | H       | -4.23262500 | -2.86903000 | -0.72532800 |
| H                                                                                 | 2.08930400  | 2.62313700  | 1.67286700  | H       | -5.40492100 | -3.29916300 | 0.27143100  |
|                                                                                   |             |             |             | H       | -4.73122600 | -5.09356600 | 1.76655700  |
|                                                                                   |             |             |             | O       | -4.64450300 | -4.15420400 | 1.57706800  |
|                                                                                   |             |             |             | H       | -3.73788800 | -4.02351900 | 1.22863600  |
| Nucleophilic substitution reaction of TCDD involving HO <sub>2</sub> <sup>-</sup> |             |             |             |         |             |             |             |
| IM1(S1)                                                                           |             |             |             | TS1(S1) |             |             |             |
| C                                                                                 | -2.58194500 | -1.27842900 | -0.35587200 | C       | -2.61156100 | -1.30527400 | -0.35841300 |

|         |             |             |             |         |             |             |             |
|---------|-------------|-------------|-------------|---------|-------------|-------------|-------------|
| C       | -1.39054800 | -0.56430500 | -0.28516400 | C       | -1.42872900 | -0.57815500 | -0.33065300 |
| C       | -1.43114100 | 0.82164000  | -0.03899100 | C       | -1.47322200 | 0.80741300  | -0.09976100 |
| C       | -2.65396000 | 1.45685000  | 0.12339200  | C       | -2.69675700 | 1.43481300  | 0.09260000  |
| C       | -3.84679900 | 0.73646600  | 0.04281000  | C       | -3.88186800 | 0.70232700  | 0.05839500  |
| C       | -3.80857900 | -0.63390200 | -0.19949800 | C       | -3.83901800 | -0.67282300 | -0.16782500 |
| H       | -2.66901000 | 2.52260000  | 0.30915100  | H       | -2.71581900 | 2.50180100  | 0.27012500  |
| C       | 0.95149400  | -0.47135500 | -0.21537700 | C       | 0.91048400  | -0.48854900 | -0.43739700 |
| C       | 2.17869700  | -1.26518000 | -0.14664800 | C       | 2.11190400  | -1.14189500 | -0.57037600 |
| C       | 3.36009300  | -0.38752000 | -0.29510200 | C       | 3.31097000  | -0.43175200 | -0.43507000 |
| C       | 3.28938400  | 0.98144200  | -0.10888200 | C       | 3.26480200  | 0.94480500  | -0.22006200 |
| C       | 2.08141000  | 1.65842700  | 0.07169100  | C       | 2.03606500  | 1.60650800  | -0.09036900 |
| C       | 0.92002500  | 0.87993200  | -0.04117500 | C       | 0.86634900  | 0.89148900  | -0.20735300 |
| H       | 2.03271600  | 2.70469400  | 0.32944500  | H       | 2.00000000  | 2.67118700  | 0.09797500  |
| Cl      | -5.27770300 | -1.59330700 | -0.31060300 | Cl      | -5.29925300 | -1.64571500 | -0.21822000 |
| Cl      | 4.86323900  | -1.19128600 | -0.78954200 | Cl      | 4.81044800  | -1.24177300 | -0.84287200 |
| O       | -0.29980800 | 1.57892900  | 0.01203500  | O       | -0.34581500 | 1.57146100  | -0.07154800 |
| O       | -0.22515800 | -1.22114100 | -0.46055300 | O       | -0.26133100 | -1.24018300 | -0.54097100 |
| H       | -2.54048600 | -2.34414700 | -0.53729600 | H       | -2.56320500 | -2.37257400 | -0.52831600 |
| H       | 2.17227100  | -2.09815700 | -0.86256700 | H       | 2.13461200  | -2.21129200 | -0.71466700 |
| Cl      | -5.36351100 | 1.60108200  | 0.25089900  | Cl      | -5.39865100 | 1.55248400  | 0.30453900  |
| Cl      | 4.76899900  | 1.96672100  | -0.10594400 | Cl      | 4.73173000  | 1.90275400  | -0.03933100 |
| O       | 2.33660100  | -1.31568700 | 2.28875100  | O       | 2.15188400  | -1.15579100 | 2.42374300  |
| H       | 3.14560000  | -0.80563500 | 2.11388000  | H       | 2.58137100  | -0.45393900 | 2.92606800  |
| O       | 2.26370400  | -2.15439200 | 1.10708100  | O       | 3.30449700  | -1.72553400 | 1.69834600  |
| IM2(S1) |             |             |             | IM1(S2) |             |             |             |
| C       | -2.37615700 | -1.44376900 | 0.07799300  | C       | -2.57136100 | -1.27400300 | -0.37163600 |
| C       | -1.17447400 | -0.77747400 | 0.22653500  | C       | -1.37887400 | -0.56591700 | -0.25660700 |
| C       | -1.16200400 | 0.59932100  | 0.45752400  | C       | -1.42201300 | 0.81562200  | 0.01712500  |
| C       | -2.34993600 | 1.29914600  | 0.54607000  | C       | -2.64779300 | 1.45074900  | 0.16239400  |
| C       | -3.56569700 | 0.62925300  | 0.40538800  | C       | -3.83983700 | 0.73606400  | 0.04048200  |
| C       | -3.57870700 | -0.74210400 | 0.17062200  | C       | -3.79928300 | -0.62971500 | -0.23047000 |
| H       | -2.32374400 | 2.36866200  | 0.70165800  | H       | -2.66457000 | 2.51303200  | 0.36720500  |
| C       | 1.15856400  | -0.78912400 | 0.16643100  | C       | 0.96344400  | -0.48078200 | -0.12070300 |
| C       | 2.34691000  | -1.46538600 | -0.02657900 | C       | 2.20262500  | -1.26549200 | -0.11658500 |
| C       | 3.55903200  | -0.76994000 | -0.02267200 | C       | 3.36814000  | -0.37900700 | -0.31268100 |
| C       | 3.55232900  | 0.60993700  | 0.19115500  | C       | 3.29812700  | 0.97955400  | -0.11985400 |
| C       | 2.36211400  | 1.29419400  | 0.39499200  | C       | 2.08771100  | 1.65809000  | 0.10542600  |
| C       | 1.16591900  | 0.59220200  | 0.38120900  | C       | 0.93143700  | 0.88194600  | 0.03336800  |
| H       | 2.34389300  | 2.36597900  | 0.53497800  | H       | 2.04950400  | 2.70584200  | 0.35894700  |
| Cl      | -5.07991700 | -1.63489200 | -0.00815400 | Cl      | -5.26779400 | -1.58191200 | -0.39544800 |
| Cl      | -0.05710300 | 0.59297300  | -2.63095000 | Cl      | 4.86215200  | -1.18233000 | -0.81282400 |
| O       | 0.01405800  | 1.28113200  | 0.65643300  | O       | -0.29231700 | 1.57197100  | 0.10966500  |
| O       | -0.01334900 | -1.50849700 | 0.18206400  | O       | -0.21282900 | -1.22502900 | -0.41063100 |
| H       | -2.37114200 | -2.50558500 | -0.12574300 | H       | -2.52849600 | -2.33548000 | -0.57650900 |
| H       | 2.34405200  | -2.53216700 | -0.20626500 | H       | 2.17110800  | -2.08890500 | -0.84309600 |
| Cl      | -5.04968300 | 1.55771400  | 0.53919600  | Cl      | -5.35878000 | 1.59955400  | 0.23427400  |
| Cl      | 5.07376300  | 1.49836100  | 0.21263000  | Cl      | 4.76334000  | 1.97953600  | -0.18134500 |
| O       | 5.43983500  | -1.72108600 | 0.99516100  | O       | 2.36201200  | -1.34944100 | 2.31773300  |
| H       | 6.03203400  | -0.95316400 | 1.01075600  | H       | 1.53931700  | -0.83653100 | 2.24101700  |
| O       | 4.71790100  | -1.45178900 | -0.28911900 | O       | 2.30533500  | -2.16913200 | 1.12219700  |
| TS1(S2) |             |             |             | IM2(S2) |             |             |             |
| C       | -2.62225100 | -1.30791200 | -0.35487900 | C       | -2.25706800 | -0.75108100 | 0.00238000  |
| C       | -1.43641200 | -0.58803000 | -0.29127400 | C       | -1.00038000 | -0.16691800 | 0.00360900  |
| C       | -1.47752300 | 0.79580000  | -0.04641200 | C       | -0.85347100 | 1.21891300  | 0.02673600  |
| C       | -2.70271800 | 1.42664300  | 0.12652800  | C       | -1.96696200 | 2.03940800  | 0.05329400  |
| C       | -3.89049400 | 0.70068200  | 0.06154200  | C       | -3.23647200 | 1.46556500  | 0.05675400  |
| C       | -3.85038600 | -0.67189800 | -0.18046500 | C       | -3.38053500 | 0.07576700  | 0.03073500  |

|                                                                               |             |             |             |         |             |             |             |
|-------------------------------------------------------------------------------|-------------|-------------|-------------|---------|-------------|-------------|-------------|
| H                                                                             | -2.71999800 | 2.49159900  | 0.31604000  | H       | -1.84138600 | 3.11352300  | 0.07140300  |
| C                                                                             | 0.90508500  | -0.49971400 | -0.39095200 | C       | 1.32700800  | -0.40311800 | -0.05672200 |
| C                                                                             | 2.10664100  | -1.14593400 | -0.56335200 | C       | 2.45390200  | -1.21280300 | -0.10749000 |
| C                                                                             | 3.30434100  | -0.43248200 | -0.44894700 | C       | 3.72700400  | -0.64567800 | -0.16055000 |
| C                                                                             | 3.25880800  | 0.94576400  | -0.24194600 | C       | 3.86182100  | 0.74601700  | -0.14379100 |
| C                                                                             | 2.03151500  | 1.59875100  | -0.07780300 | C       | 2.74200900  | 1.56413200  | -0.07932500 |
| C                                                                             | 0.86186500  | 0.87846100  | -0.15825200 | C       | 1.47727600  | 0.98932000  | -0.03539500 |
| H                                                                             | 1.99521200  | 2.66194300  | 0.11809300  | H       | 2.83336300  | 2.64200500  | -0.06905900 |
| Cl                                                                            | -5.31392100 | -1.63687900 | -0.27282400 | Cl      | -4.96377300 | -0.66318200 | 0.03249600  |
| Cl                                                                            | 4.79697300  | -1.23940900 | -0.88063500 | Cl      | -2.40811400 | -4.08012700 | -0.14189900 |
| O                                                                             | -0.34898500 | 1.55285200  | 0.01812000  | O       | 0.39588400  | 1.82952300  | 0.02607800  |
| O                                                                             | -0.26706500 | -1.25824200 | -0.46888900 | O       | 0.10393600  | -1.00072100 | -0.01792900 |
| H                                                                             | -2.57665500 | -2.37290300 | -0.53984300 | H       | -2.34622500 | -1.85603400 | -0.02623000 |
| H                                                                             | 2.13110600  | -2.21367200 | -0.72209600 | H       | 2.33759100  | -2.28923300 | -0.11604000 |
| Cl                                                                            | -5.40743200 | 1.55509200  | 0.28908800  | Cl      | -4.62313900 | 2.54538200  | 0.09350900  |
| Cl                                                                            | 4.72324400  | 1.90971900  | -0.11024000 | Cl      | 5.45998600  | 1.47755600  | -0.21930000 |
| O                                                                             | 2.29685800  | -1.04276700 | 2.48599500  | O       | 5.50129200  | -1.59897100 | 1.00818800  |
| H                                                                             | 1.78972800  | -1.83630100 | 2.69048500  | H       | 6.21585600  | -0.95453900 | 0.88722100  |
| O                                                                             | 3.42782800  | -1.61888700 | 1.72764600  | O       | 4.81534900  | -1.47064900 | -0.30263900 |
| Nucleophilic addition reaction of TCDD involving HO <sub>2</sub> <sup>-</sup> |             |             |             |         |             |             |             |
| IM1(A1)                                                                       |             |             |             | TS1(A1) |             |             |             |
| C                                                                             | 2.34676800  | -1.23058300 | -0.09611600 | C       | 2.44943100  | -1.23742100 | 0.15837700  |
| C                                                                             | 1.08774000  | -0.63238000 | 0.34481700  | C       | 1.18102700  | -0.67366800 | 0.53446800  |
| C                                                                             | 1.11449700  | 0.82867000  | 0.27631100  | C       | 1.13429500  | 0.76853700  | 0.50349900  |
| C                                                                             | 2.25186700  | 1.55800800  | 0.08445800  | C       | 2.20670400  | 1.54433100  | 0.15500800  |
| C                                                                             | 3.48777400  | 0.92618900  | -0.14893900 | C       | 3.44154400  | 0.96294300  | -0.17834700 |
| C                                                                             | 3.48388500  | -0.46355800 | -0.27028600 | C       | 3.51912700  | -0.42786300 | -0.19130000 |
| H                                                                             | 2.18596100  | 2.63974900  | 0.08973700  | H       | 2.07855300  | 2.61906800  | 0.10831900  |
| C                                                                             | -1.20808500 | -0.53379500 | -0.27141500 | C       | -1.16297900 | -0.53969400 | -0.33494800 |
| C                                                                             | -2.40813100 | -1.18230300 | -0.54566500 | C       | -2.37829300 | -1.11062000 | -0.73900400 |
| C                                                                             | -3.62726800 | -0.51776100 | -0.42303500 | C       | -3.59231400 | -0.45753300 | -0.54982900 |
| C                                                                             | -3.65294000 | 0.80604500  | 0.00911200  | C       | -3.62685100 | 0.78158500  | 0.08508900  |
| C                                                                             | -2.45949500 | 1.46162700  | 0.30270300  | C       | -2.43521800 | 1.36165000  | 0.51540100  |
| C                                                                             | -1.23947900 | 0.80985300  | 0.15681800  | C       | -1.21905700 | 0.72644500  | 0.30597000  |
| H                                                                             | -2.46667800 | 2.49091300  | 0.63610200  | H       | -2.44344600 | 2.32542400  | 1.00785100  |
| Cl                                                                            | 4.97366000  | -1.32065900 | -0.71700600 | Cl      | 5.03128100  | -1.23536200 | -0.64148500 |
| Cl                                                                            | -5.10466400 | -1.39132600 | -0.81621800 | Cl      | -5.06694100 | -1.23893400 | -1.12351600 |
| O                                                                             | -0.10933100 | 1.50599400  | 0.43097300  | O       | -0.09890900 | 1.38119400  | 0.74152600  |
| O                                                                             | -0.04228400 | -1.19184100 | -0.45257200 | O       | -0.01530600 | -1.16811300 | -0.56310900 |
| H                                                                             | 2.35421400  | -2.28496300 | -0.33362400 | H       | 2.53887300  | -2.31157600 | 0.08708200  |
| H                                                                             | -2.37658700 | -2.21698500 | -0.85988300 | H       | -2.34977100 | -2.08245000 | -1.21376400 |
| Cl                                                                            | 4.94677600  | 1.91479800  | -0.29242600 | Cl      | 4.80683200  | 2.01325400  | -0.57005600 |
| Cl                                                                            | -5.16308300 | 1.69280300  | 0.19291700  | Cl      | -5.13535500 | 1.65223700  | 0.35837700  |
| O                                                                             | 0.65340400  | -2.39485600 | 1.97086400  | O       | 0.52531600  | -2.59641300 | 1.79112900  |
| H                                                                             | 1.60119500  | -2.58274900 | 2.05544000  | H       | 1.37253800  | -2.78711400 | 2.22067900  |
| O                                                                             | 0.69113300  | -0.95073500 | 1.75774700  | O       | 0.57513300  | -1.14239600 | 1.75634500  |
| IM1(A2)                                                                       |             |             |             | TS1(A2) |             |             |             |
| C                                                                             | 2.48157300  | -1.37066400 | 0.31386300  | C       | -2.46281000 | 1.32340000  | 0.39602000  |
| C                                                                             | 1.23182600  | 0.63472500  | -0.23633300 | C       | -1.21697000 | -0.64951600 | -0.30789300 |
| C                                                                             | 2.43327700  | 1.26879900  | -0.54375600 | C       | -2.43667100 | -1.24217800 | -0.65598600 |
| C                                                                             | 3.64892300  | 0.59497300  | -0.44418700 | C       | -3.64476100 | -0.56710000 | -0.50596800 |
| C                                                                             | 3.67473200  | -0.72666400 | -0.00595700 | C       | -3.66320400 | 0.71855900  | 0.02863200  |
| H                                                                             | 2.40517400  | 2.30242200  | -0.86205000 | H       | -2.42015100 | -2.24912900 | -1.05151200 |
| C                                                                             | -1.08047800 | -0.74078200 | 0.27248100  | C       | 1.09874900  | 0.71508200  | 0.35643900  |
| C                                                                             | -2.17414600 | -1.47253700 | -0.08631200 | C       | 2.16449200  | 1.46817700  | -0.05216600 |
| C                                                                             | -3.40950000 | -0.84741400 | -0.35152000 | C       | 3.40293800  | 0.86517700  | -0.34588000 |

|         |             |             |             |         |             |             |             |
|---------|-------------|-------------|-------------|---------|-------------|-------------|-------------|
| C       | -3.45866600 | 0.53799300  | -0.26364100 | C       | 3.49793200  | -0.51450600 | -0.23281500 |
| C       | -2.35771500 | 1.30482600  | 0.10432500  | C       | 2.42431000  | -1.29546600 | 0.19297800  |
| C       | -1.07691900 | 0.70631600  | 0.42597100  | C       | 1.14853500  | -0.71921200 | 0.49298400  |
| H       | -2.42496400 | 2.38461900  | 0.12215800  | H       | 2.52547400  | -2.37072200 | 0.26082600  |
| Cl      | 5.18133500  | -1.62452200 | 0.14998500  | Cl      | -5.16234500 | 1.61803700  | 0.24926600  |
| Cl      | -4.80494100 | -1.84850800 | -0.76757900 | Cl      | 4.75440000  | 1.89011500  | -0.83684400 |
| O       | 0.07133600  | 1.31237900  | -0.37429500 | O       | -0.07294300 | -1.31142400 | -0.49096400 |
| O       | 0.13505300  | -1.40335400 | 0.49274000  | O       | -0.12271200 | 1.34343700  | 0.58624900  |
| H       | 2.48663400  | -2.39896700 | 0.65049800  | H       | -2.45840900 | 2.32373500  | 0.80895500  |
| H       | -2.07780900 | -2.54771300 | -0.17931400 | H       | 2.03856500  | 2.53773900  | -0.16807500 |
| Cl      | 5.12426300  | 1.45533800  | -0.87402100 | Cl      | -5.12973300 | -1.38133000 | -0.99843100 |
| Cl      | -4.96628800 | 1.40536100  | -0.60769400 | Cl      | 5.01945600  | -1.34765000 | -0.58570400 |
| C       | 1.26456100  | -0.71045400 | 0.19226900  | C       | -1.25349100 | 0.66380900  | 0.22566300  |
| O       | -1.44273900 | 0.72449800  | 2.78615200  | O       | 1.26485000  | -0.85891700 | 2.84250800  |
| H       | -2.29886800 | 1.04951900  | 2.44854400  | H       | 2.16293100  | -1.15011800 | 2.60194100  |
| O       | -0.54355900 | 1.18460700  | 1.75105200  | O       | 0.50668900  | -1.28994500 | 1.67657500  |
| IM1(A3) |             |             |             | TS1(A3) |             |             |             |
| C       | -2.47144800 | 1.36015300  | 0.31599700  | C       | -2.46004200 | 1.32423500  | 0.39023200  |
| C       | -1.22180700 | -0.65899600 | -0.19179300 | C       | -1.20871600 | -0.67086400 | -0.22769300 |
| C       | -2.42382800 | -1.28316100 | -0.52352000 | C       | -2.41867600 | -1.26317400 | -0.60348900 |
| C       | -3.63615000 | -0.60031400 | -0.45473300 | C       | -3.62713800 | -0.57898300 | -0.50363500 |
| C       | -3.66291000 | 0.72434500  | -0.02650300 | C       | -3.65312100 | 0.71809500  | 0.00166500  |
| H       | -2.39691900 | -2.31869100 | -0.83566500 | H       | -2.39618300 | -2.27853300 | -0.97648700 |
| C       | 1.09191300  | 0.71876300  | 0.32738700  | C       | 1.10153200  | 0.69763500  | 0.39419500  |
| C       | 2.17268100  | 1.46167400  | -0.07729700 | C       | 2.15515100  | 1.46044800  | -0.04438000 |
| C       | 3.39438400  | 0.84440800  | -0.37191200 | C       | 3.37916800  | 0.86330300  | -0.37125100 |
| C       | 3.44962800  | -0.55058200 | -0.27761200 | C       | 3.46987700  | -0.52717400 | -0.26658800 |
| C       | 2.36860600  | -1.31588500 | 0.10992200  | C       | 2.41341800  | -1.30991100 | 0.16140000  |
| C       | 1.10149800  | -0.72369900 | 0.47706400  | C       | 1.14586600  | -0.73811700 | 0.52088100  |
| H       | 2.46014600  | -2.39017200 | 0.19050000  | H       | 2.53324600  | -2.37918000 | 0.26649000  |
| Cl      | -5.16532300 | 1.63549900  | 0.08871600  | Cl      | -5.15194200 | 1.63049400  | 0.15816900  |
| Cl      | 4.77655500  | 1.84251900  | -0.83874900 | Cl      | 4.72455900  | 1.88508400  | -0.88921000 |
| O       | -0.07088500 | -1.35111400 | -0.29990400 | O       | -0.06750600 | -1.35643900 | -0.36281700 |
| O       | -0.13187200 | 1.37585000  | 0.56983600  | O       | -0.12619300 | 1.32441600  | 0.67023700  |
| H       | -2.47606900 | 2.39125900  | 0.64439600  | H       | -2.46163000 | 2.33460100  | 0.77820500  |
| H       | 2.06113200  | 2.53445700  | -0.18265300 | H       | 2.02073400  | 2.53017000  | -0.15193600 |
| Cl      | -5.10793800 | -1.45317100 | -0.91127200 | Cl      | -5.10075700 | -1.39606300 | -1.02110500 |
| Cl      | 4.95913700  | -1.40459600 | -0.64602800 | Cl      | 4.99023300  | -1.35142400 | -0.65192400 |
| C       | -1.25727600 | 0.69004900  | 0.22909800  | C       | -1.24967000 | 0.65415000  | 0.27375400  |
| O       | 1.46467300  | -0.72143400 | 2.84946800  | O       | 1.38165200  | -0.84955000 | 2.88620700  |
| H       | 1.43395800  | 0.24375300  | 2.73687800  | H       | 1.26636100  | 0.11467500  | 2.87851700  |
| O       | 0.56616800  | -1.17897600 | 1.81242600  | O       | 0.54904800  | -1.26307100 | 1.77185400  |
| IM2(A2) |             |             |             | TS2(A2) |             |             |             |
| C       | -2.26644700 | 0.97315200  | 0.74144600  | C       | -2.29759400 | -1.08364500 | 0.32115100  |
| C       | -1.29606800 | -0.07493800 | -1.30752900 | C       | -1.29253700 | 1.20137300  | 0.26333000  |
| C       | -2.63798400 | -0.52533800 | -1.57358200 | C       | -2.65318400 | 1.69544200  | 0.22670700  |
| C       | -3.70902300 | -0.23257300 | -0.74721400 | C       | -3.73482100 | 0.85760500  | 0.17476200  |
| C       | -3.55181300 | 0.52177200  | 0.41877800  | C       | -3.56804800 | -0.55132700 | 0.21031600  |
| H       | -2.79437100 | -1.10327100 | -2.47547200 | H       | -2.78038800 | 2.76862400  | 0.17637200  |
| C       | 1.19803900  | 0.57067800  | 0.20325400  | C       | 1.17609400  | -0.35010000 | 0.29385600  |
| C       | 2.33053000  | 1.31752100  | -0.12358000 | C       | 2.24878500  | -0.49428100 | 1.17170400  |
| C       | 3.59358700  | 0.74184300  | -0.14887600 | C       | 3.52693500  | -0.16495400 | 0.76585100  |
| C       | 3.75591700  | -0.60761300 | 0.16735500  | C       | 3.76204800  | 0.24723800  | -0.57485400 |
| C       | 2.64014700  | -1.35067100 | 0.53287500  | C       | 2.74000000  | 0.29865700  | -1.48155700 |
| C       | 1.37023600  | -0.78446900 | 0.55643300  | C       | 1.37441600  | 0.01690100  | -1.10460200 |
| H       | 2.73853900  | -2.39316600 | 0.80476000  | H       | 2.92012500  | 0.58738200  | -2.50821500 |
| Cl      | -4.89554200 | 0.93622300  | 1.48644900  | Cl      | -4.94091800 | -1.63584300 | 0.10473200  |

|                                                 |             |             |             |                                                               |             |             |             |
|-------------------------------------------------|-------------|-------------|-------------|---------------------------------------------------------------|-------------|-------------|-------------|
| Cl                                              | 4.96279200  | 1.74736400  | -0.59766700 | Cl                                                            | 4.83428400  | -0.26711700 | 1.92772200  |
| O                                               | -0.30868000 | -0.29219800 | -2.05467900 | O                                                             | -0.29916900 | 1.95713200  | 0.23792300  |
| O                                               | 0.03324700  | 1.26306400  | 0.26626800  | O                                                             | -0.00852300 | -0.83537600 | 0.68556400  |
| H                                               | -2.11209200 | 1.58961300  | 1.61963800  | H                                                             | -2.12029900 | -2.15095700 | 0.30001500  |
| H                                               | 2.19727500  | 2.35532500  | -0.39689100 | H                                                             | 2.06295100  | -0.83688400 | 2.18067300  |
| Cl                                              | -5.31249000 | -0.83868300 | -1.20684400 | Cl                                                            | -5.34929800 | 1.56052400  | 0.05916800  |
| Cl                                              | 5.33091200  | -1.38799000 | 0.14499200  | Cl                                                            | 5.38918200  | 0.67664000  | -1.09588200 |
| C                                               | -1.19006400 | 0.67320200  | -0.07341800 | C                                                             | -1.19020000 | -0.24638300 | 0.36143400  |
| O                                               | -0.28373100 | -1.19694100 | 2.13874900  | O                                                             | -0.04882800 | -2.66166900 | -1.33784900 |
| H                                               | -1.08439800 | -0.75855800 | 1.79056500  | H                                                             | -0.07925700 | -2.38246200 | -2.26179400 |
| O                                               | 0.33120000  | -1.62303300 | 0.86515400  | O                                                             | 0.42905300  | 0.01162500  | -1.90854000 |
| Transition states in the substitution processes |             |             |             |                                                               |             |             |             |
| F-TCDD + H <sub>2</sub> O <sub>2</sub>          |             |             |             | Br-TCDD + H <sub>2</sub> O <sub>2</sub>                       |             |             |             |
| C                                               | 5.14130800  | 1.01184500  | 0.21529300  | C                                                             | -4.67228600 | -0.71679600 | 0.02855300  |
| C                                               | 3.85393500  | 1.48106600  | 0.42276400  | C                                                             | -3.43688400 | -1.35365300 | 0.15339900  |
| C                                               | 2.77288300  | 0.64915000  | 0.16050500  | C                                                             | -2.26495000 | -0.61515900 | 0.13667800  |
| C                                               | 2.98253400  | -0.65141100 | -0.30808600 | C                                                             | -2.31476800 | 0.77332100  | -0.00661500 |
| C                                               | 4.27735200  | -1.11472000 | -0.51252800 | C                                                             | -3.53975900 | 1.41006000  | -0.13164400 |
| C                                               | 5.35103300  | -0.27906200 | -0.24967800 | C                                                             | -4.72309000 | 0.67131800  | -0.11463800 |
| C                                               | 0.66925000  | -0.99958600 | -0.33947000 | C                                                             | 0.02142700  | 0.86247700  | 0.09380600  |
| C                                               | 0.45600300  | 0.29726500  | 0.12500100  | C                                                             | 0.07301900  | -0.52951100 | 0.23290600  |
| C                                               | -0.42352400 | -1.82269900 | -0.56023800 | C                                                             | 1.19574200  | 1.58793700  | 0.08320200  |
| C                                               | -0.82100100 | 0.77814300  | 0.36832100  | C                                                             | 1.28318500  | -1.18432900 | 0.34767100  |
| C                                               | -1.69659900 | -1.34035600 | -0.31295000 | C                                                             | 2.43060400  | 0.94059200  | 0.21237200  |
| C                                               | -1.94495200 | -0.02024400 | 0.10360600  | C                                                             | 2.47522300  | -0.45391000 | 0.27868200  |
| O                                               | 1.94358100  | -1.50348300 | -0.58179700 | O                                                             | -1.17884500 | 1.54318100  | -0.02840300 |
| O                                               | 1.50982500  | 1.15526700  | 0.37665100  | O                                                             | -1.07275100 | -1.29292500 | 0.26403700  |
| H                                               | 4.44423100  | -2.12037500 | -0.87566900 | H                                                             | -3.56061000 | 2.48588400  | -0.24217700 |
| H                                               | 3.69078000  | 2.48757000  | 0.78526500  | H                                                             | -3.37648800 | -2.42800900 | 0.26465500  |
| H                                               | -0.95480000 | 1.78549200  | 0.73842700  | H                                                             | 1.30367100  | -2.26015800 | 0.45144800  |
| H                                               | -0.28893200 | -2.83227100 | -0.92753600 | H                                                             | 1.15300000  | 2.66373300  | -0.02720400 |
| H                                               | -2.07613900 | -1.30300800 | 2.07813400  | H                                                             | 2.88737000  | 0.42350600  | 2.58274300  |
| O                                               | -2.64836500 | -0.59951200 | 2.44249700  | O                                                             | 3.14854700  | -0.48356000 | 2.82903100  |
| O                                               | -3.08762100 | 0.08394900  | 1.25510900  | O                                                             | 3.53172100  | -1.04342700 | 1.55211200  |
| H                                               | -4.11460000 | -0.43426400 | 0.92171000  | H                                                             | 4.58087700  | -0.86169700 | 1.51112500  |
| O                                               | -5.15187800 | -0.96744800 | 0.58261400  | O                                                             | 5.98134700  | -0.72025200 | 1.79767800  |
| H                                               | -4.93307000 | -1.56131700 | -0.14858900 | H                                                             | 6.20670700  | -0.07846300 | 2.47791800  |
| H                                               | -5.82655000 | -0.28903300 | 0.25094700  | H                                                             | 6.66316400  | -0.64130700 | 1.07740000  |
| O                                               | -6.78497600 | 0.80801700  | -0.33012800 | O                                                             | 7.88355000  | -0.45706100 | -0.04201200 |
| H                                               | -7.48668000 | 1.20771700  | 0.19144900  | H                                                             | 8.40765300  | -1.24298500 | -0.22387200 |
| H                                               | -6.26325500 | 1.53503100  | -0.74933700 | H                                                             | 7.52967200  | -0.15499700 | -0.90746500 |
| H                                               | -4.78320200 | 3.38519400  | -1.40344800 | H                                                             | 6.67551900  | 0.26757600  | -3.22183500 |
| O                                               | -5.00396500 | 2.45218500  | -1.46868800 | O                                                             | 6.53405200  | 0.34848800  | -2.27392900 |
| H                                               | -4.18051100 | 1.95227700  | -1.30268800 | H                                                             | 5.65984000  | -0.04116500 | -2.09229500 |
| F                                               | -2.78270800 | -2.15217200 | -0.55735100 | Br                                                            | 4.02479100  | 1.99618000  | 0.16734200  |
| F                                               | -3.03815100 | 0.70800400  | -0.84404300 | Br                                                            | 3.95166700  | -1.52180600 | -1.14788600 |
| F                                               | 6.19614700  | 1.81153600  | 0.46550000  | Br                                                            | -6.23813800 | -1.80401700 | 0.06274100  |
| F                                               | 6.60810900  | -0.72083000 | -0.44676700 | Br                                                            | -6.36449500 | 1.62559800  | -0.29147700 |
| TCDD + CH <sub>3</sub> OOH                      |             |             |             | F-TCDD + HO <sub>2</sub> <sup>-</sup> (substitution reaction) |             |             |             |
| C                                               | -5.02254000 | -1.01388800 | 0.13773600  | C                                                             | -2.64032300 | -1.27395200 | -0.53491500 |
| C                                               | -3.71219400 | -1.48826400 | 0.17805300  | C                                                             | -1.48318500 | -0.50381000 | -0.47216100 |
| C                                               | -2.64802100 | -0.61312900 | 0.03371400  | C                                                             | -1.55610700 | 0.82716000  | -0.02980300 |
| C                                               | -2.88446700 | 0.75118300  | -0.15466700 | C                                                             | -2.78207500 | 1.36961600  | 0.34164700  |
| C                                               | -4.18628600 | 1.22607700  | -0.19657600 | C                                                             | -3.92845300 | 0.59349800  | 0.26557600  |
| C                                               | -5.25996100 | 0.34926200  | -0.05007800 | C                                                             | -3.85775400 | -0.71967500 | -0.16999100 |
| C                                               | -0.57876200 | 1.12623200  | -0.28124500 | H                                                             | -2.83774700 | 2.39412400  | 0.68591900  |

|                                                                |             |             |             |                                                                            |             |             |             |
|----------------------------------------------------------------|-------------|-------------|-------------|----------------------------------------------------------------------------|-------------|-------------|-------------|
| C                                                              | -0.34126700 | -0.23648200 | -0.09464500 | C                                                                          | 0.84791500  | -0.32426900 | -0.63802100 |
| C                                                              | 0.49021700  | 1.98709700  | -0.45047400 | C                                                                          | 2.06484000  | -0.93672800 | -0.85095900 |
| C                                                              | 0.94976700  | -0.73451400 | -0.08146200 | C                                                                          | 3.23375000  | -0.22694400 | -0.59816700 |
| C                                                              | 1.79751600  | 1.50022000  | -0.43531600 | C                                                                          | 3.15862100  | 1.09130900  | -0.17592300 |
| C                                                              | 2.02034800  | 0.13148800  | -0.29025500 | C                                                                          | 1.93287800  | 1.71234800  | 0.04405800  |
| O                                                              | -1.86121700 | 1.65350400  | -0.30063000 | C                                                                          | 0.77526100  | 0.99804800  | -0.19576000 |
| O                                                              | -1.37392700 | -1.13304800 | 0.08470600  | H                                                                          | 1.89020500  | 2.73489200  | 0.39588200  |
| Cl                                                             | -6.88004700 | 0.99873900  | -0.10877600 | O                                                                          | -0.45236600 | 1.62793600  | 0.03208400  |
| Cl                                                             | -6.32946400 | -2.15678500 | 0.32621500  | O                                                                          | -0.31107700 | -1.07136400 | -0.86743300 |
| Cl                                                             | 3.12307900  | 2.62524000  | -0.65765500 | H                                                                          | -2.58409900 | -2.30283400 | -0.86554800 |
| Cl                                                             | 3.41170000  | -0.63185700 | -1.77098600 | H                                                                          | 2.12257700  | -1.97703800 | -1.13381000 |
| H                                                              | -4.35729100 | 2.28407000  | -0.34402800 | O                                                                          | 2.08659100  | -1.43784700 | 2.10932200  |
| H                                                              | -3.51341200 | -2.54184700 | 0.32212900  | H                                                                          | 2.50654500  | -0.86628500 | 2.76119600  |
| H                                                              | 1.11442200  | -1.79301300 | 0.06164300  | O                                                                          | 3.27137800  | -1.86506200 | 1.31755800  |
| H                                                              | 0.30649800  | 3.04353600  | -0.59792600 | F                                                                          | -4.98710700 | -1.46696600 | -0.23794000 |
| O                                                              | 2.96257500  | -0.22280000 | 2.24459100  | F                                                                          | -5.12593800 | 1.12313200  | 0.61984300  |
| O                                                              | 3.30366100  | -0.34120500 | 0.84636000  | F                                                                          | 4.30185700  | 1.79242700  | 0.06050800  |
| H                                                              | 4.28101300  | 0.05970100  | 0.71048100  | F                                                                          | 4.42831000  | -0.74323400 | -0.94123200 |
| O                                                              | 5.63413000  | 0.53825700  | 0.59829700  |                                                                            |             |             |             |
| H                                                              | 5.69777000  | 0.98824400  | -0.25278200 |                                                                            |             |             |             |
| H                                                              | 6.26433500  | -0.23120900 | 0.56235500  |                                                                            |             |             |             |
| O                                                              | 7.08327600  | -1.68410900 | 0.47562000  |                                                                            |             |             |             |
| H                                                              | 7.98650300  | -1.81207200 | 0.17283300  |                                                                            |             |             |             |
| H                                                              | 6.51532900  | -2.31601700 | -0.02242400 |                                                                            |             |             |             |
| H                                                              | 4.76058600  | -3.85562600 | -0.56777700 |                                                                            |             |             |             |
| O                                                              | 5.27705200  | -3.13336400 | -0.93841900 |                                                                            |             |             |             |
| H                                                              | 4.62874300  | -2.46670200 | -1.23533800 |                                                                            |             |             |             |
| C                                                              | 3.08533500  | 1.13021300  | 2.70682300  |                                                                            |             |             |             |
| H                                                              | 2.34636300  | 1.78047600  | 2.23818300  |                                                                            |             |             |             |
| H                                                              | 2.87905300  | 1.04078700  | 3.77532000  |                                                                            |             |             |             |
| H                                                              | 4.09802400  | 1.50809400  | 2.55391600  |                                                                            |             |             |             |
| Br-TCDD + HO <sub>2</sub> <sup>-</sup> (substitution reaction) |             |             |             | TCDD + CH <sub>3</sub> O <sub>2</sub> <sup>-</sup> (substitution reaction) |             |             |             |
| C                                                              | -2.54031500 | -1.32979200 | -0.22908100 | C                                                                          | -2.76233600 | -1.27922300 | -0.49977300 |
| C                                                              | -1.34607000 | -0.62089000 | -0.24551600 | C                                                                          | -1.58196200 | -0.54857800 | -0.47444600 |
| C                                                              | -1.37222800 | 0.78085700  | -0.15348600 | C                                                                          | -1.62038900 | 0.81931700  | -0.15738500 |
| C                                                              | -2.58890000 | 1.44182100  | -0.05090000 | C                                                                          | -2.83640500 | 1.42675400  | 0.12520500  |
| C                                                              | -3.78677800 | 0.72722800  | -0.04045700 | C                                                                          | -4.01984500 | 0.69129800  | 0.09383400  |
| C                                                              | -3.76232100 | -0.66411400 | -0.12984400 | C                                                                          | -3.98279100 | -0.66642800 | -0.21975500 |
| H                                                              | -2.58845200 | 2.52125600  | 0.01956100  | H                                                                          | -2.85093000 | 2.48029200  | 0.37041300  |
| C                                                              | 0.99567700  | -0.57638800 | -0.30444800 | C                                                                          | 0.75114600  | -0.44077700 | -0.66713100 |
| C                                                              | 2.18867500  | -1.25710500 | -0.34189800 | C                                                                          | 1.94939600  | -1.08002700 | -0.87839300 |
| C                                                              | 3.39678700  | -0.55318800 | -0.24992300 | C                                                                          | 3.15209600  | -0.37507200 | -0.74476800 |
| C                                                              | 3.36989200  | 0.83667600  | -0.17251700 | C                                                                          | 3.10844500  | 0.98792300  | -0.45208900 |
| C                                                              | 2.14759400  | 1.52708400  | -0.13782500 | C                                                                          | 1.88638000  | 1.63096200  | -0.23373200 |
| C                                                              | 0.97022300  | 0.82062600  | -0.21261500 | C                                                                          | 0.71220300  | 0.91921500  | -0.35050100 |
| H                                                              | 2.12034000  | 2.60533300  | -0.05719800 | H                                                                          | 1.85462700  | 2.68064200  | 0.02597300  |
| O                                                              | -0.23300300 | 1.52733000  | -0.17566200 | Cl                                                                         | -5.44088800 | -1.64159800 | -0.27279100 |
| O                                                              | -0.18598700 | -1.31668800 | -0.36304000 | Cl                                                                         | 4.63247200  | -1.15048000 | -1.26966600 |
| H                                                              | -2.50071200 | -2.40894200 | -0.29200400 | O                                                                          | -0.49504200 | 1.58598700  | -0.12918900 |
| H                                                              | 2.19206000  | -2.33554300 | -0.38161900 | O                                                                          | -0.42122800 | -1.19079500 | -0.77452900 |
| O                                                              | 2.12505000  | -0.99668900 | 2.62747500  | H                                                                          | -2.71816600 | -2.33336300 | -0.73890800 |
| H                                                              | 2.56934800  | -0.26793300 | 3.07589600  | H                                                                          | 1.96848600  | -2.14015900 | -1.08195000 |
| O                                                              | 3.26990400  | -1.67575600 | 1.99445800  | Cl                                                                         | -5.52698000 | 1.51589900  | 0.45543800  |
| Br                                                             | -5.35549300 | -1.72634700 | -0.12104100 | Cl                                                                         | 4.57633900  | 1.94064500  | -0.28023500 |
| Br                                                             | -5.41551800 | 1.72602500  | 0.09685800  | O                                                                          | 2.24203700  | -1.17415900 | 2.16602800  |
| Br                                                             | 5.01499800  | -1.52844200 | -0.56710200 | O                                                                          | 3.33398000  | -1.71276600 | 1.36144200  |
| Br                                                             | 4.96647800  | 1.89400300  | -0.02069900 | C                                                                          | 2.82205200  | -0.56274600 | 3.27896200  |

|                                                                        |             |             |             |            |
|------------------------------------------------------------------------|-------------|-------------|-------------|------------|
|                                                                        | H           | 3.38030300  | -1.28957800 | 3.89251200 |
|                                                                        | H           | 3.51887300  | 0.23879200  | 2.98597300 |
|                                                                        | H           | 2.00486100  | -0.13438200 | 3.87914900 |
| F-TCDD + HO <sub>2</sub> <sup>-</sup> (addition reaction)              |             |             |             |            |
| C                                                                      | -2.50422400 | 1.31209700  | 0.49038700  |            |
| C                                                                      | -1.25574500 | -0.55396600 | -0.46204800 |            |
| C                                                                      | -2.47320200 | -1.12126000 | -0.85860600 |            |
| C                                                                      | -3.67271800 | -0.47623600 | -0.60329500 |            |
| C                                                                      | -3.69148700 | 0.73077200  | 0.07314900  |            |
| H                                                                      | -2.46899000 | -2.07573000 | -1.36924100 |            |
| C                                                                      | 1.06314600  | 0.74225900  | 0.29434600  |            |
| C                                                                      | 2.11310100  | 1.55659200  | -0.04194800 |            |
| C                                                                      | 3.33202300  | 1.00005500  | -0.44874500 |            |
| C                                                                      | 3.43776500  | -0.37162500 | -0.52382600 |            |
| C                                                                      | 2.39148900  | -1.22141400 | -0.17926500 |            |
| C                                                                      | 1.11641600  | -0.70255800 | 0.23170700  |            |
| H                                                                      | 2.51226000  | -2.29229400 | -0.28533600 |            |
| O                                                                      | -0.10443500 | -1.18225200 | -0.74365300 |            |
| O                                                                      | -0.15736700 | 1.32389500  | 0.64533300  |            |
| H                                                                      | -2.51715200 | 2.25747500  | 1.01781600  |            |
| H                                                                      | 1.99096400  | 2.63295300  | -0.00940600 |            |
| C                                                                      | -1.29023300 | 0.68678300  | 0.22208800  |            |
| O                                                                      | 1.37277500  | -1.15714500 | 2.54072500  |            |
| H                                                                      | 2.25543100  | -1.36386300 | 2.18017200  |            |
| O                                                                      | 0.53512300  | -1.42345100 | 1.38207800  |            |
| F                                                                      | 4.39566100  | 1.81602600  | -0.75494100 |            |
| F                                                                      | 4.62283800  | -0.92737600 | -0.91860700 |            |
| F                                                                      | -4.84513800 | -1.03602800 | -1.01526100 |            |
| F                                                                      | -4.87772400 | 1.35449800  | 0.32286200  |            |
| TCDD + CH <sub>3</sub> O <sub>2</sub> <sup>-</sup> (addition reaction) |             |             |             |            |
| C                                                                      | -2.57103100 | 1.20861400  | 0.73700800  |            |
| C                                                                      | -1.31421300 | -0.41801900 | -0.55877900 |            |
| C                                                                      | -2.52239600 | -0.90637900 | -1.05732200 |            |
| C                                                                      | -3.74048000 | -0.34150500 | -0.68571400 |            |
| C                                                                      | -3.76726400 | 0.71531000  | 0.22034700  |            |
| H                                                                      | -2.49489200 | -1.74136100 | -1.74485200 |            |
| C                                                                      | 0.99767600  | 0.71733100  | 0.40417400  |            |
| C                                                                      | 2.06257500  | 1.56942300  | 0.30972900  |            |
| C                                                                      | 3.29636600  | 1.12519200  | -0.19593200 |            |
| C                                                                      | 3.37262700  | -0.19452300 | -0.63330700 |            |
| C                                                                      | 2.30103200  | -1.07034400 | -0.55167300 |            |
| C                                                                      | 1.03738700  | -0.67600100 | 0.01778000  |            |
| H                                                                      | 2.39895400  | -2.08523800 | -0.91204100 |            |
| Cl                                                                     | -5.27724900 | 1.46387800  | 0.73373600  |            |
| Cl                                                                     | 4.65950300  | 2.24936900  | -0.25144100 |            |
| O                                                                      | -0.15742300 | -0.97128200 | -0.96442200 |            |
| O                                                                      | -0.22470700 | 1.21245900  | 0.88035200  |            |
| H                                                                      | -2.57603200 | 2.03261400  | 1.43839200  |            |
| H                                                                      | 1.93775800  | 2.60051900  | 0.61783700  |            |
| Cl                                                                     | -5.21990900 | -1.00077000 | -1.38102200 |            |
| Cl                                                                     | 4.88698800  | -0.82978300 | -1.30586300 |            |
| C                                                                      | -1.35166400 | 0.66467200  | 0.35171200  |            |
| O                                                                      | 1.26748400  | -1.45681600 | 2.26800800  |            |
| O                                                                      | 0.49046800  | -1.62094100 | 1.05064100  |            |
| C                                                                      | 2.05186700  | -2.62490400 | 2.42787900  |            |
| H                                                                      | 1.42149600  | -3.52104300 | 2.46873800  |            |
| H                                                                      | 2.79355200  | -2.72302000 | 1.62982000  |            |
| Br-TCDD + HO <sub>2</sub> <sup>-</sup> (addition reaction)             |             |             |             |            |
| C                                                                      | -2.42655400 | 1.30913600  | 0.42928800  |            |
| C                                                                      | -1.17805600 | -0.71456700 | -0.10625700 |            |
| C                                                                      | -2.39595600 | -1.32735900 | -0.42861000 |            |
| C                                                                      | -3.60388000 | -0.63869300 | -0.34934300 |            |
| C                                                                      | -3.62545100 | 0.68344600  | 0.08812700  |            |
| H                                                                      | -2.37243800 | -2.36069100 | -0.74785500 |            |
| C                                                                      | 1.13236000  | 0.69000700  | 0.49461800  |            |
| C                                                                      | 2.20691300  | 1.40542500  | 0.04369100  |            |
| C                                                                      | 3.44970800  | 0.77830300  | -0.18191100 |            |
| C                                                                      | 3.53649100  | -0.58904500 | 0.04218600  |            |
| C                                                                      | 2.45319700  | -1.33069500 | 0.51113600  |            |
| C                                                                      | 1.17600900  | -0.72780100 | 0.74460100  |            |
| H                                                                      | 2.54381700  | -2.39695600 | 0.67053200  |            |
| O                                                                      | -0.03593500 | -1.39124600 | -0.22122200 |            |
| O                                                                      | -0.08983700 | 1.33659500  | 0.65416900  |            |
| H                                                                      | -2.41876800 | 2.33664500  | 0.76848100  |            |
| H                                                                      | 2.08226100  | 2.46215100  | -0.15785300 |            |
| C                                                                      | -1.21770900 | 0.63482300  | 0.32744400  |            |
| O                                                                      | 1.23746200  | -0.68301200 | 3.09734600  |            |
| H                                                                      | 2.13701200  | -1.00877100 | 2.91530100  |            |
| O                                                                      | 0.50813300  | -1.20594300 | 1.95050800  |            |
| Br                                                                     | 4.91679300  | 1.86703000  | -0.77641900 |            |
| Br                                                                     | 5.18664900  | -1.55240300 | -0.23267900 |            |
| Br                                                                     | -5.20265200 | -1.58083600 | -0.85556000 |            |
| Br                                                                     | -5.24287300 | 1.70845400  | 0.23651900  |            |
| HO <sub>2</sub> <sup>-</sup>                                           |             |             |             |            |
| O                                                                      | 0.05584900  | -0.70724200 | 0.00000000  |            |
| H                                                                      | -0.89359000 | -0.86354200 | 0.00000000  |            |
| O                                                                      | 0.05584900  | 0.81518500  | 0.00000000  |            |

|                     |             |             |             |                                 |             |             |             |
|---------------------|-------------|-------------|-------------|---------------------------------|-------------|-------------|-------------|
| H                   | 2.55903000  | -2.48885100 | 3.38805600  |                                 |             |             |             |
| F-TCDD              |             |             |             | Br-TCDD                         |             |             |             |
| C                   | -2.36984200 | -1.39721500 | 0.00000400  | C                               | -2.36910400 | -1.39054000 | 0.00004300  |
| C                   | -1.17075200 | -0.69794100 | 0.00004800  | C                               | -1.16988700 | -0.69781500 | 0.00009200  |
| C                   | -1.17075200 | 0.69794400  | 0.00004400  | C                               | -1.16985700 | 0.69770200  | 0.00008700  |
| C                   | -2.36984200 | 1.39721100  | -0.00000500 | C                               | -2.36906700 | 1.39057800  | 0.00003700  |
| C                   | -3.56474300 | 0.69417500  | -0.00004500 | C                               | -3.58100500 | 0.69828000  | -0.00000600 |
| C                   | -3.56474400 | -0.69417900 | -0.00004100 | C                               | -3.58100600 | -0.69823200 | -0.00000500 |
| H                   | -2.37237800 | 2.47933800  | -0.00000900 | H                               | -2.34918900 | 2.47213400  | 0.00003500  |
| C                   | 1.17075200  | -0.69794000 | 0.00005800  | C                               | 1.16988700  | -0.69781400 | 0.00010200  |
| C                   | 2.36984200  | -1.39721500 | 0.00002300  | C                               | 2.36910400  | -1.39054000 | 0.00006300  |
| C                   | 3.56474400  | -0.69417900 | -0.00001100 | C                               | 3.58100600  | -0.69823100 | 0.00002500  |
| C                   | 3.56474300  | 0.69417500  | -0.00001600 | C                               | 3.58100400  | 0.69828000  | 0.00002300  |
| C                   | 2.36984200  | 1.39721100  | 0.00001500  | C                               | 2.36906700  | 1.39057800  | 0.00005600  |
| C                   | 1.17075200  | 0.69794400  | 0.00005300  | C                               | 1.16985600  | 0.69770300  | 0.00009700  |
| H                   | 2.37237800  | 2.47933800  | 0.00001100  | H                               | 2.34919000  | 2.47213500  | 0.00005300  |
| O                   | 0.00000000  | 1.42652300  | 0.00009200  | O                               | 0.00000000  | 1.42538200  | 0.00013500  |
| O                   | 0.00000000  | -1.42652100 | 0.00010400  | O                               | 0.00000000  | -1.42547900 | 0.00015700  |
| H                   | -2.37237100 | -2.47933900 | 0.00000700  | H                               | -2.34936700 | -2.47214400 | 0.00004600  |
| H                   | 2.37237100  | -2.47933900 | 0.00002600  | H                               | 2.34936700  | -2.47214400 | 0.00006600  |
| F                   | -4.73322000 | 1.35947200  | -0.00008900 | Br                              | -5.18679100 | 1.72441200  | -0.00006500 |
| F                   | -4.73321600 | -1.35947000 | -0.00008100 | Br                              | -5.18680700 | -1.72439700 | -0.00006400 |
| F                   | 4.73321600  | -1.35947000 | -0.00004200 | Br                              | 5.18680700  | -1.72439700 | -0.00002400 |
| F                   | 4.73322000  | 1.35947200  | -0.00005000 | Br                              | 5.18679100  | 1.72441200  | -0.00002500 |
| CH <sub>3</sub> OOH |             |             |             | CH <sub>3</sub> OO <sup>-</sup> |             |             |             |
| O                   | -0.01605300 | 0.60355700  | -0.03870900 | O                               | -0.05767800 | 0.60813900  | -0.00000400 |
| O                   | -1.15832800 | -0.30500300 | -0.07093800 | O                               | -1.24362400 | -0.27552900 | 0.00001400  |
| H                   | -1.73721500 | 0.13023900  | 0.56997700  | C                               | 1.05121500  | -0.22061000 | -0.00002500 |
| C                   | 1.13533400  | -0.21903000 | 0.02961600  | H                               | 1.07514400  | -0.87761200 | 0.89140800  |
| H                   | 1.19147000  | -0.88847800 | -0.83413100 | H                               | 1.07441400  | -0.87841400 | -0.89084600 |
| H                   | 1.97166400  | 0.48334900  | 0.00599300  | H                               | 1.95356500  | 0.41880800  | -0.00049000 |
| H                   | 1.15713000  | -0.79935700 | 0.95764600  |                                 |             |             |             |

\* All the geometries have been obtained at the B3LYP/6-311++G\*\* level of theory.



**Table S3.** Calculated energy parameters for the optimized species in the present study\*

| TCDD                                            | H <sub>2</sub> O <sub>2</sub>           | TS1                        | TS2                                                              | TS3                                                               | TS4                                                                           |
|-------------------------------------------------|-----------------------------------------|----------------------------|------------------------------------------------------------------|-------------------------------------------------------------------|-------------------------------------------------------------------------------|
| -2451.030752                                    | -151.575731                             | -2602.523461               | -2602.523204                                                     | -2602.520460                                                      | -2602.523784                                                                  |
| -2451.015921                                    | -151.572488                             | -2602.505439               | -2602.504944                                                     | -2602.502244                                                      | -2602.505408                                                                  |
| -2451.014977                                    | -151.571544                             | -2602.504494               | -2602.504000                                                     | -2602.501300                                                      | -2602.504464                                                                  |
| -2451.073408                                    | -151.597391                             | -2602.571303               | -2602.571379                                                     | -2602.568741                                                      | -2602.572581                                                                  |
| IM1(0w)                                         | TS1(0w)                                 | IM2(0w)                    | TS2(0w)                                                          | IM1(1w)                                                           | TS1(1w)                                                                       |
| -2602.608905                                    | -2602.523461                            | -2602.618952               | -2602.611157                                                     | -2679.054612                                                      | -2678.977198                                                                  |
| -2602.588789                                    | -2602.505439                            | -2602.599592               | -2602.592829                                                     | -2679.031370                                                      | -2678.956167                                                                  |
| -2602.587844                                    | -2602.504494                            | -2602.598648               | -2602.591884                                                     | -2679.030426                                                      | -2678.955223                                                                  |
| -2602.664004                                    | -2602.571303                            | -2602.671328               | -2602.661339                                                     | -2679.113051                                                      | -2679.028582                                                                  |
| IM2(1w)                                         | TS2(1w)                                 | IM1(2w)                    | TS1(2w)                                                          | IM2(2w)                                                           | TS2(2w)                                                                       |
| -2679.065619                                    | -2679.056346                            | -2755.502992               | -2755.430219                                                     | -2755.513329                                                      | -2755.495374                                                                  |
| -2679.043332                                    | -2679.035493                            | -2755.476947               | -2755.406699                                                     | -2755.487971                                                      | -2755.471110                                                                  |
| -2679.042388                                    | -2679.034549                            | -2755.476003               | -2755.405755                                                     | -2755.487026                                                      | -2755.470166                                                                  |
| -2679.122782                                    | -2679.109189                            | -2755.564194               | -2755.484852                                                     | -2755.576259                                                      | -2755.553807                                                                  |
| IM1(3w)                                         | TS1(3w)                                 | IM2(3w)                    | TS2(3w)                                                          | P(0w)                                                             | P(1w)                                                                         |
| -2831.952161                                    | -2831.880399                            | -2831.959308               | -2831.937352                                                     | -2526.856398                                                      | -2603.304846                                                                  |
| -2831.922913                                    | -2831.853788                            | -2831.931092               | -2831.909991                                                     | -2526.839163                                                      | -2603.284663                                                                  |
| -2831.921969                                    | -2831.852844                            | -2831.930148               | -2831.909047                                                     | -2526.838219                                                      | -2603.283719                                                                  |
| -2832.019108                                    | -2831.939970                            | -2832.026082               | -2831.999999                                                     | -2526.905889                                                      | -2603.358911                                                                  |
| P(2w)                                           | P(3w)                                   | IM1(S1)                    | TS1(S1)                                                          | IM2(S1)                                                           | IM1(S2)                                                                       |
| -2679.752338                                    | -2756.198450                            | -2602.051809               | -2602.038930                                                     | -2602.111094                                                      | -2602.050229                                                                  |
| -2679.729136                                    | -2756.173577                            | -2602.033504               | -2602.020375                                                     | -2602.092254                                                      | -2602.031926                                                                  |
| -2679.728192                                    | -2756.172633                            | -2602.032560               | -2602.019431                                                     | -2602.091310                                                      | -2602.030982                                                                  |
| -2679.811530                                    | -2756.259604                            | -2602.100057               | -2602.087879                                                     | -2602.160921                                                      | -2602.098509                                                                  |
| TS1(S2)                                         | IM2(S2)                                 | IM1(A1)                    | TS1(A1)                                                          | IM1(A2)                                                           | TS1(A2)                                                                       |
| -2602.037827                                    | -2602.110862                            | -2602.058776               | -2602.057830                                                     | -2602.062825                                                      | -2602.062960                                                                  |
| -2602.019128                                    | -2602.092096                            | -2602.040555               | -2602.040018                                                     | -2602.044923                                                      | -2602.045498                                                                  |
| -2602.018183                                    | -2602.091152                            | -2602.039611               | -2602.039074                                                     | -2602.043979                                                      | -2602.044554                                                                  |
| -2602.087225                                    | -2602.162103                            | -2602.106580               | -2602.105056                                                     | -2602.109976                                                      | -2602.109510                                                                  |
| IM1(A3)                                         | TS1(A3)                                 | IM2(A2)                    | TS2(A2)                                                          |                                                                   |                                                                               |
| -2602.061066                                    | -2602.061459                            | -2602.098038               | -2602.073734                                                     |                                                                   |                                                                               |
| -2602.042866                                    | -2602.043826                            | -2602.079718               | -2602.054586                                                     |                                                                   |                                                                               |
| -2602.041922                                    | -2602.042882                            | -2602.078774               | -2602.053642                                                     |                                                                   |                                                                               |
| -2602.108777                                    | -2602.108311                            | -2602.146416               | -2602.123850                                                     |                                                                   |                                                                               |
| Transition states in the substitution processes |                                         |                            |                                                                  |                                                                   |                                                                               |
| F-TCDD + H <sub>2</sub> O <sub>2</sub>          | Br-TCDD + H <sub>2</sub> O <sub>2</sub> | TCDD + CH <sub>3</sub> OOH | F-TCDD + HO <sub>2</sub> <sup>-</sup><br>(substitution reaction) | Br-TCDD + HO <sub>2</sub> <sup>-</sup><br>(substitution reaction) | TCDD + CH <sub>3</sub> O <sub>2</sub> <sup>-</sup><br>(substitution reaction) |
| -1390.454759                                    | -11287.564559                           | -2871.165957               | -1160.609479                                                     | -11057.720557                                                     | -2641.328978                                                                  |
| -1390.430285                                    | -11287.536511                           | -2871.138027               | -1160.592399                                                     | -11057.700674                                                     | -2641.309133                                                                  |
| -1390.429340                                    | -11287.535566                           | -2871.137083               | -1160.591454                                                     | -11057.699730                                                     | -2641.308189                                                                  |
| -1390.510873                                    | -11287.628780                           | -2871.227404               | -1160.655594                                                     | -11057.773962                                                     | -2641.380893                                                                  |

| F-TCDD +<br>HO <sub>2</sub> <sup>-</sup> (addition<br>reaction) | Br-TCDD +<br>HO <sub>2</sub> <sup>-</sup> (addition<br>reaction) | TCDD +<br>CH <sub>3</sub> O <sub>2</sub> <sup>-</sup><br>(addition<br>reaction) | HO <sub>2</sub> <sup>-</sup> | F-TCDD       | Br-TCDD       |
|-----------------------------------------------------------------|------------------------------------------------------------------|---------------------------------------------------------------------------------|------------------------------|--------------|---------------|
| -1160.626895                                                    | -11057.745592                                                    | -2641.346489                                                                    | -150.982553                  | -1009.602212 | -10906.711682 |
| -1160.611055                                                    | -11057.726904                                                    | -2641.327728                                                                    | -150.979609                  | -1009.588853 | -10906.695598 |
| -1160.610110                                                    | -11057.725959                                                    | -2641.326784                                                                    | -150.978665                  | -1009.587909 | -10906.694654 |
| -1160.669890                                                    | -11057.796353                                                    | -2641.394665                                                                    | -151.004354                  | -1009.643221 | -10906.759919 |
| CH <sub>3</sub> OOH                                             | CH <sub>3</sub> OO <sup>-</sup>                                  | H <sub>2</sub> O                                                                |                              |              |               |
| -190.864844                                                     | -190.277536                                                      | -76.437242                                                                      |                              |              |               |
| -190.860435                                                     | -190.273792                                                      | -76.434406                                                                      |                              |              |               |
| -190.859491                                                     | -190.272848                                                      | -76.433462                                                                      |                              |              |               |
| -190.890460                                                     | -190.302351                                                      | -76.454884                                                                      |                              |              |               |

\* The energy parameters from top to bottom refer to the sums of electronic and zero-point energies, electronic and thermal energies, electronic and thermal enthalpies, electronic and thermal free energies, respectively. All the results have been obtained at the B3LYP/6-311++G\*\* level of theory.
